# Supplementary material for: Mediators of the association between educational attainment and type 2 diabetes mellitus: a two-step multivariable Mendelian randomisation study
Source: PubMed Central journal article supplement (PMC9283137; doi:10.1007/s00125-022-05705-6), 2022-04-28
Supplement: 125_2022_5705_MOESM1_ESM.pdf [file 125_2022_5705_MOESM1_ESM.pdf]

# Mediators of the association between educational attainment and type 2 diabetes mellitus: a two-step multivariable Mendelian randomisation study

## Electronic supplementary material (ESM)

### ESM Methods.

ESM Methods 1. Mendelian randomisation (MR) assumptions and methods

ESM Methods 2. Observational mediation analysis in NHANES 2013-2014

### ESM SNP data (.xlsx)

**ESM Table 1.** MR heterogeneity tests

**ESM Table 2.** MR directional pleiotropy tests

**ESM Table 3.** MR of EA on T2D

**ESM Table 4.** MR of EA on mediators

**ESM Table 5.** Sensitivity analysis of MVMR

**ESM Table 6.** Reverse MR of mediators on EA

**ESM Table 7.** Characteristics of 1912 Non-Hispanic white participants from the NHANES 2013-2014 survey

**ESM Table 8.** NHANES observational estimates of single mediation

**ESM Figure 1.** Directed acyclic graph for 2-step Mendelian randomisation

**ESM Figure 2.** Directed acyclic graph of tested pathways in NHANES 2013-2014

**ESM Figure 3a.** Mendelian randomisation scatterplots of education to type 2 diabetes and mediators associations

**ESM Figure 3b.** Mendelian randomisation scatterplots of mediators to education associations

**ESM Figure 4.** MVMR estimates of proportion mediated by each mediator separately using the difference method

**ESM Figure 5.** Estimates for the effect of education on type 2 diabetes explained by mediators individually (product of coefficients method)

**ESM Figure 6.** MVMR estimates of combined proportion mediated by selected combinations of mediators

### Supplementary References

## ESM Methods

### ESM Methods 1. Mendelian randomisation assumptions and methods

Causal inference in traditional observational epidemiological studies is limited due to confounding and reverse causation. MR is a method that can be used to uncover causal relationships between exposure and outcome in the presence of such limitations[1]. MR uses SNPs to genetically predict exposures. MR estimates are unconfounded, and thus valid estimates of causality, under a number of key assumptions. The first is the relevance assumption, which assumes that the genetic instruments are strongly associated with the exposure; this assumption is satisfied by the selection of SNPs with robust genome-wide significant ( $P < 5 \times 10^{-8}$ ) and replicated associations. The second is the independence assumption, which requires that genetic instruments are not associated with any confounder of the relationship between exposure and outcome; this is assumed to be true due to Mendel's law of independent segregation, in which genetic variants for a certain trait are inherited independently of other traits. The third is the exclusion restriction criterion, which requires that any effect of the genetic instrument on the outcome variable is solely through the exposure variable. This assumption might be violated due to horizontal pleiotropy, in which a genetic instrument might have direct effects on both the exposure and the outcome. To assess robustness of our results against horizontal pleiotropy, we performed sensitivity analyses. Firstly, we assessed the heterogeneity of Wald ratios (i.e. single SNP MR effect estimates) to find evidence of potential pleiotropy; large heterogeneity in Wald ratios is suggestive of horizontal pleiotropy (**Supp Table S1**). Second, we examined MR funnel plots of Wald ratios; asymmetry in the funnel plots is suggestive of directional horizontal pleiotropy (data not shown). Third, we examined the Egger intercept; significant deviation from a zero intercept is suggestive of directional horizontal pleiotropy (**Supp Table S2**). Finally, we conducted two sensitivity MR analyses that relax the exclusion restriction criterion: a) Mendelian randomisation-Egger (MR-Egger)[2, 3], which allows for estimation of causal effects in the presence of directional horizontal pleiotropy, but assumes that the SNP strength is independent of the direct SNP effect on the outcome (InSIDE

assumption[2]); and b) weighted median MR[4], which is based on the median Wald estimate and allows for consistent estimation even when up to 50% of the information comes from invalid, pleiotropic SNPs. Additional assumptions for the two-sample setting of the present study include that sample should represent the same underlying population (in the present study, a European ancestry population) with minimal sample overlap between studies.

## ESM Methods 2. Observational mediation analysis in NHANES 2013-2014

We used publicly available data from NHANES 2013-2014. Of this survey, a subset was selected of 1912 non-Hispanic white participants aged 30 years or older, with complete data on age, sex, BMI, hours of TV watching, smoking, SBP and DBP. Educational level was categorized according to ISCED and then assigned a value of years of schooling. Years of schooling was then rescaled so that one unit increase represented 4.2 years of schooling. Participants were categorized as diabetic in case of a  $HbA_{1c} \geq 6.5\%$ , fasting plasma glucose  $\geq 7$  mmol/L, or a 2 hour plasma glucose  $\geq 7.8$  mmol/L after an oral glucose tolerance test. BMI was calculated by dividing weight (in kg) by height squared ( $m^2$ ). Television (TV) watching was an ordinal variable but was analyzed as it were a numerical (ranging 0-5 hours) to reflect the MR analysis. For practical and computational reasons, smoking was considered a numerical variable, recoded into ever versus never smoking. SBP and DBP were averaged from multiple repeat blood pressure measurements according to recommendations. Physical activity, as measured by accelerometry, was available in the NHANES 2013-2014 survey, but was left out of the analysis for consistency with the final MR analyses.

We accounted for the complex sampling strategy in NHANES by applying the recommended weighting procedure using the *survey* R-package[5]. We then used the *svyglm()* function implemented in the *survey* R-package for multivariable regression modeling of exposure-mediator-outcome associations. In single mediator models, indirect effects through the mediator of interest were estimated using the product of coefficients method, where coefficients were obtained from linear and logistic regression where appropriate. Standard errors were approximated using the delta method. To estimate proportion mediated by multiple mediators, we applied the difference method. All observational analyses were performed using R version 4.03 software[6].

**ESM Table 1a . MR heterogeneity test (MR-Egger)**

| Exposure | Outcome           | N of SNPs | Q statistic | Q df | Q <i>p</i> -value |
|----------|-------------------|-----------|-------------|------|-------------------|
| EA       | Type 2 diabetes   | 1208      | 3669.07     | 1206 | 2.66E-246         |
|          | BMI               | 1202      | 9531.31     | 1200 | 5.32E-82          |
|          | SBP               | 1184      | 6265.94     | 1182 | 4.79E-119         |
|          | DBP               | 1188      | 6723.75     | 1186 | 7.34E-99          |
|          | TV watching       | 1211      | 3337.28     | 1209 | 3.58E-198         |
|          | Physical activity | 1207      | 2198.20     | 1205 | 8.38E-61          |
|          | Smoking           | 1196      | 3670.22     | 1194 | 2.19E-249         |

**ESM Table 1b . MR heterogeneity test (IVW)**

| Exposure | Outcome           | N of SNPs | Q statistic | Q df | Q <i>p</i> -value |
|----------|-------------------|-----------|-------------|------|-------------------|
| EA       | Type 2 diabetes   | 1208      | 3675.03     | 1207 | 6.28E-247         |
|          | BMI               | 1202      | 9537.97     | 1201 | 4.34E-76          |
|          | SBP               | 1184      | 6266.83     | 1183 | 7.13E-121         |
|          | DBP               | 1188      | 6724.90     | 1187 | 6.36E-103         |
|          | TV watching       | 1211      | 3337.60     | 1210 | 3.58E-198         |
|          | Physical activity | 1207      | 2200.83     | 1206 | 6.24E-61          |
|          | Smoking           | 1196      | 3671.48     | 1195 | 2.51E-249         |

**ESM Table 2.** MR directional pleiotropy test

| <b>Exposure</b> | <b>Outcome</b>    | <b>Egger intercept</b> | <b>SE</b> | <b>p value</b> |
|-----------------|-------------------|------------------------|-----------|----------------|
| EA              | Type 2 diabetes   | -0.0019                | 0.0013    | 0.1620         |
|                 | BMI               | -0.0006                | 0.0006    | 0.3603         |
|                 | SBP               | -0.0035                | 0.0086    | 0.6814         |
|                 | DBP               | -0.0023                | 0.0051    | 0.6531         |
|                 | TV watching       | 0.0001                 | 0.0004    | 0.7314         |
|                 | Physical activity | 0.0009                 | 0.0007    | 0.2299         |
|                 | Smoking           | -0.0005                | 0.0007    | 0.5218         |

Results from MR directional pleiotropy tests in the association between Educational attainment and outcomes.

**ESM Table 3.** Mendelian randomisation analysis of the effect of educational attainment on type 2 diabetes

| Exposure | Outcome         | Method          | N of SNPs   | Unit of MR estimated $\beta$        | $\beta$        | SE            | $p$             | OR          | 95% CI           |
|----------|-----------------|-----------------|-------------|-------------------------------------|----------------|---------------|-----------------|-------------|------------------|
| EA       | Type 2 Diabetes | MR Egger        | 1208        | Log-odds per 4.2 years of schooling | -0.4811        | 0.1171        | 4.24E-05        | 0.62        | 0.49-0.78        |
|          |                 | Weighted Median | 1208        |                                     | -0.5977        | 0.0329        | 7.58E-74        | 0.55        | 0.51-0.59        |
|          |                 | <b>IVW</b>      | <b>1208</b> |                                     | <b>-0.6381</b> | <b>0.0334</b> | <b>2.74E-81</b> | <b>0.53</b> | <b>0.49-0.56</b> |

**ESM Table 4.** Mendelian randomisation analysis of the effect of educational attainment on mediators

| Exposure | Outcome           | Method          | N of SNPs   | Unit of MR estimated $\beta$                 | $\beta$        | SE            | $p$              | OR          | 95% CI            |
|----------|-------------------|-----------------|-------------|----------------------------------------------|----------------|---------------|------------------|-------------|-------------------|
| EA       | BMI               | MR Egger        | 1202        | kg/m <sup>2</sup> per 4.2 years of schooling | -0.2947        | 0.0540        | 6.04E-08         | \           | \                 |
|          |                   | Weighted median | 1202        |                                              | -0.2889        | 0.0115        | 3.46E-138        | \           | \                 |
|          |                   | <b>IVW</b>      | <b>1202</b> |                                              | <b>-0.3421</b> | <b>0.0153</b> | <b>5.26E-111</b> | \           | \                 |
| EA       | SBP               | MR Egger        | 1184        | mmHg per 4.2 years of schooling              | -1.5282        | 0.7597        | 4.45E-02         | \           | \                 |
|          |                   | Weighted median | 1184        |                                              | -1.7347        | 0.1759        | 6.14E-23         | \           | \                 |
|          |                   | <b>IVW</b>      | <b>1184</b> |                                              | <b>-1.8279</b> | <b>0.2115</b> | <b>5.55E-18</b>  | \           | \                 |
| EA       | DBP               | MR Egger        | 1188        | mmHg per 4.2 years of schooling              | -0.619         | 0.4487        | 1.68E-01         | \           | \                 |
|          |                   | Weighted median | 1188        |                                              | -0.8305        | 0.0966        | 8.40E-18         | \           | \                 |
|          |                   | <b>IVW</b>      | <b>1188</b> |                                              | <b>-0.8127</b> | <b>0.1255</b> | <b>9.38E-11</b>  | \           | \                 |
| EA       | TV watching       | MR Egger        | 1211        | SD (1.5 hours) per 4.2 years of schooling    | -0.6218        | 0.0374        | 3.76E-56         | \           | \                 |
|          |                   | Weighted median | 1211        |                                              | -0.5599        | 0.0118        | 5.98E-121        | \           | \                 |
|          |                   | <b>IVW</b>      | <b>1211</b> |                                              | <b>-0.6096</b> | <b>0.0107</b> | <b>4.67E-77</b>  | \           | \                 |
| EA       | Physical activity | MR Egger        | 1207        | SD (undefined) per 4.2 years of schooling    | 0.0084         | 0.0630        | 8.94E-01         | \           | \                 |
|          |                   | Weighted median | 1207        |                                              | 0.0746         | 0.0219        | 6.00E-04         | \           | \                 |
|          |                   | <b>IVW</b>      | <b>1207</b> |                                              | <b>0.0809</b>  | <b>0.0180</b> | <b>6.62E-06</b>  | \           | \                 |
| EA       | Smoking           | MR Egger        | 1196        | Log-odds per 4.2 years of schooling          | -0.415         | 0.0649        | 2.33E-10         | 0.66        | 0.58- 0.75        |
|          |                   | Weighted median | 1196        |                                              | -0.3973        | 0.0192        | 4.14E-95         | 0.67        | 0.65- 0.70        |
|          |                   | <b>IVW</b>      | <b>1196</b> |                                              | <b>-0.4548</b> | <b>0.0188</b> | <b>7.02E-130</b> | <b>0.63</b> | <b>0.61- 0.66</b> |



ESM Table 5a. MVMR sensitivity analysis of individual mediating effect

| Model      | Variable          | Method     | $\beta$ | SE     | $p$      | MVMR Instrument validity test |              | MVMR Heterogeneity test |             |      | MVMR directional pleiotropy test |                 |       | N of SNPs |            |
|------------|-------------------|------------|---------|--------|----------|-------------------------------|--------------|-------------------------|-------------|------|----------------------------------|-----------------|-------|-----------|------------|
|            |                   |            |         |        |          | Conditional F-statistics      | Q statistics | $p$ -value              | Q statistic | Q df | $p$ -value                       | Egger intercept | SE    |           | $p$ -value |
| T2D=EA+SBP | Education         | MV-IVW     | -0.6010 | 0.0340 | 1.23E-62 | 27.18                         | 3680.70      | 1.46E-240               | 3770.50     | 1237 | 0.00E+00                         | -0.001          | 0.001 | 3.01E-01  | 1240       |
|            | SBP               |            | 0.0186  | 0.0045 | 4.05E-05 | 11.12                         |              |                         |             |      |                                  |                 |       |           |            |
|            | Edu               | MVMR-Egger | -0.4830 | 0.1190 | 0.00E+00 |                               |              |                         |             |      |                                  |                 |       |           |            |
|            | SBP               |            | 0.0190  | 0.0050 | 0.00E+00 |                               |              |                         |             |      |                                  |                 |       |           |            |
| T2D=EA+DBP | Education         | MV-IVW     | -0.6095 | 0.0335 | 8.78E-66 | 27.81                         | 3691.09      | 4.09E-241               | 3778.16     | 1241 | 0.00E+00                         | -0.001          | 0.001 | 2.82E-01  | 1244       |
|            | DBP               |            | 0.0297  | 0.0077 | 1.10E-04 | 10.92                         |              |                         |             |      |                                  |                 |       |           |            |
|            | Education         | MVMR-Egger | -0.4870 | 0.1190 | 0.00E+00 |                               |              |                         |             |      |                                  |                 |       |           |            |
|            | DBP               |            | 0.0300  | 0.0080 | 0.00E+00 |                               |              |                         |             |      |                                  |                 |       |           |            |
| T2D=EA+BMI | Education         | MV-IVW     | -0.2805 | 0.0349 | 2.27E-15 | 24.13                         | 2796.15      | 5.93E-119               | 3041.50     | 1255 | 0.00E+00                         | -0.001          | 0.001 | 4.22E-01  | 1258       |
|            | BMI               |            | 1.0259  | 0.0560 | 1.05E-66 | 22.01                         |              |                         |             |      |                                  |                 |       |           |            |
|            | Education         | MVMR-Egger | -0.2020 | 0.1040 | 5.30E-02 |                               |              |                         |             |      |                                  |                 |       |           |            |
|            | BMI               |            | 1.0250  | 0.0560 | 0.00E+00 |                               |              |                         |             |      |                                  |                 |       |           |            |
| T2D=EA+SI  | Education         | MV-IVW     | -0.5616 | 0.0404 | 5.43E-41 | 26.47                         | 3726.57      | 1.41E-244               | 3804.01     | 1248 | 0.00E+00                         | -0.001          | 0.001 | 3.27E-01  | 1251       |
|            | Smoking           |            | 0.1429  | 0.0507 | 4.93E-03 | 2.96                          |              |                         |             |      |                                  |                 |       |           |            |
|            | Education         | MVMR-Egger | -0.4540 | 0.1170 | 0.00E+00 |                               |              |                         |             |      |                                  |                 |       |           |            |
|            | Smoking           |            | 0.1420  | 0.0510 | 5.00E-03 |                               |              |                         |             |      |                                  |                 |       |           |            |
| T2D=EA+TV  | Education         | MV-IVW     | -0.2700 | 0.0622 | 1.55E-05 | 23.95                         | 3556.51      | 6.50E-219               | 3707.84     | 1254 | 0.00E+00                         | -0.002          | 0.001 | 2.43E-01  | 1257       |
|            | TV watching       |            | 0.5918  | 0.0867 | 1.36E-11 | 2.47                          |              |                         |             |      |                                  |                 |       |           |            |
|            | Education         | MVMR-Egger | -0.1410 | 0.1260 | 2.63E-01 |                               |              |                         |             |      |                                  |                 |       |           |            |
|            | TV watching       |            | 0.5940  | 0.0870 | 0.00E+00 |                               |              |                         |             |      |                                  |                 |       |           |            |
| T2D=EA+PA  | Education         | MV-IVW     | -0.6095 | 0.0329 | 7.51E-68 | 35.17                         | 3569.33      | 1.25E-221               | 3762.12     | 1250 | 0.00E+00                         | -0.001          | 0.001 | 3.47E-01  | 1253       |
|            | Physical activity |            | -0.2763 | 0.0524 | 1.55E-07 | 1.82                          |              |                         |             |      |                                  |                 |       |           |            |
|            | Education         | MVMR-Egger | -0.5050 | 0.1160 | 0.00E+00 |                               |              |                         |             |      |                                  |                 |       |           |            |
|            | Physical activity |            | -0.2750 | 0.0520 | 0.00E+00 |                               |              |                         |             |      |                                  |                 |       |           |            |

ESM Table 5b. MVMR sensitivity analysis of combined mediating effect after adjusting for two mediators

| Model          | Variable          | Method     | $\beta$ | SE     | $p$      | MVMR Instrument validity test |              |            | MVMR Heterogeneity test |      |            | MVMR directional pleiotropy test |       |            | N of SNPs |       |
|----------------|-------------------|------------|---------|--------|----------|-------------------------------|--------------|------------|-------------------------|------|------------|----------------------------------|-------|------------|-----------|-------|
|                |                   |            |         |        |          | Conditional F-statistics      | Q statistics | $p$ -value | Q statistic             | Q df | $p$ -value | Egger intercept                  | SE    | $p$ -value |           |       |
| T2D=EA+TV+SI   | Education         | MV-IVW     | -0.2053 | 0.0659 | 1.89E-03 | 22.75                         | 3497.33      | 2.07E-212  | 3660.26                 | 1246 | 0.00E+00   | -0.001                           | 0.001 | 2.81E-01   | 1250      |       |
|                | TV watching       |            | 0.5909  | 0.0869 | 1.63E-11 |                               |              |            |                         |      |            |                                  |       |            |           | 2.35  |
|                | Smoking           |            | 0.1330  | 0.0498 | 7.72E-03 |                               |              |            |                         |      |            |                                  |       |            |           | 2.97  |
|                | Education         | MVMR-Egger | -0.0870 | 0.1280 | 4.93E-01 | 0.00E+00                      |              |            |                         |      |            |                                  |       |            |           |       |
|                | TV watching       |            | 0.5930  | 0.0870 | 0.00E+00 |                               |              |            |                         |      |            |                                  |       |            |           |       |
|                | Smoking           |            | 0.1320  | 0.0500 | 8.00E-03 |                               |              |            |                         |      |            |                                  |       |            |           |       |
| T2D=EA+TV+PA   | Education         | MV-IVW     | -0.2932 | 0.0623 | 2.84E-06 | 22.67                         | 3460.62      | 1.28E-206  | 3657.77                 | 1249 | 0.00E+00   | -0.001                           | 0.001 | 2.79E-01   | 1253      |       |
|                | TV watching       |            | 0.5243  | 0.0882 | 3.54E-09 |                               |              |            |                         |      |            |                                  |       |            |           | 2.20  |
|                | Physical activity |            | 0.2150  | 0.0527 | 4.78E-05 |                               |              |            |                         |      |            |                                  |       |            |           | 1.70  |
|                | Education         | MVMR-Egger | -0.1730 | 0.1270 | 1.72E-01 | 0.00E+00                      |              |            |                         |      |            |                                  |       |            |           |       |
|                | TV watching       |            | 0.5260  | 0.0880 | 0.00E+00 |                               |              |            |                         |      |            |                                  |       |            |           |       |
|                | Physical activity |            | 0.2130  | 0.0530 | 0.00E+00 |                               |              |            |                         |      |            |                                  |       |            |           |       |
| T2D=EA+SI+PA   | Education         | MV-IVW     | -0.5441 | 0.0402 | 4.72E-39 | 16.49                         | 3515.09      | 8.38E-216  | 3712.57                 | 1242 | 0.00E+00   | -0.001                           | 0.001 | 4.02E-01   | 1246      |       |
|                | Smoking           |            | 0.1336  | 0.0503 | 8.03E-03 |                               |              |            |                         |      |            |                                  |       |            |           | 2.95  |
|                | Physical activity |            | -0.2768 | 0.0523 | 1.45E-07 |                               |              |            |                         |      |            |                                  |       |            |           | 1.81  |
|                | Education         | MVMR-Egger | -0.4520 | 0.1170 | 0.00E+00 | 0.00E+00                      |              |            |                         |      |            |                                  |       |            |           |       |
|                | Smoking           |            | 0.1330  | 0.0500 | 9.00E-03 |                               |              |            |                         |      |            |                                  |       |            |           |       |
|                | Physical activity |            | -0.2750 | 0.0520 | 0.00E+00 |                               |              |            |                         |      |            |                                  |       |            |           |       |
| T2D=EA+SBP+TV  | Education         | MV-IVW     | -0.2665 | 0.0628 | 2.36E-05 | 21.82                         | 3500.88      | 7.64E-216  | 3651.62                 | 1233 | 0.00E+00   | -0.002                           | 0.001 | 2.55E-01   | 1237      |       |
|                | SBP               |            | 0.0161  | 0.0045 | 3.33E-04 |                               |              |            |                         |      |            |                                  |       |            |           | 10.12 |
|                | TV watching       |            | 0.5512  | 0.0877 | 4.58E-10 |                               |              |            |                         |      |            |                                  |       |            |           | 2.36  |
|                | Education         | MVMR-Egger | -0.1370 | 0.1300 | 2.92E-01 | 0.00E+00                      |              |            |                         |      |            |                                  |       |            |           |       |
|                | SBP               |            | 0.0160  | 0.0040 | 0.00E+00 |                               |              |            |                         |      |            |                                  |       |            |           |       |
|                | TV watching       |            | 0.5530  | 0.0880 | 0.00E+00 |                               |              |            |                         |      |            |                                  |       |            |           |       |
| T2D=EA+SBP+SI  | Education         | MV-IVW     | -0.5179 | 0.0418 | 2.53E-33 | 20.10                         | 3607.50      | 1.28E-232  | 3714.36                 | 1226 | 0.00E+00   | -0.001                           | 0.001 | 3.79E-01   | 1230      |       |
|                | SBP               |            | 0.0195  | 0.0045 | 1.91E-05 |                               |              |            |                         |      |            |                                  |       |            |           | 9.20  |
|                | Smoking           |            | 0.1674  | 0.0511 | 1.09E-03 |                               |              |            |                         |      |            |                                  |       |            |           | 2.95  |
|                | Education         | MVMR-Egger | -0.4180 | 0.1210 | 1.00E-03 | 0.00E+00                      |              |            |                         |      |            |                                  |       |            |           |       |
|                | SBP               |            | 0.0190  | 0.0050 | 0.00E+00 |                               |              |            |                         |      |            |                                  |       |            |           |       |
|                | Smoking           |            | 0.1660  | 0.0510 | 1.00E-03 |                               |              |            |                         |      |            |                                  |       |            |           |       |
| T2D=EA+SBP+DBP | Education         | MV-IVW     | -0.6019 | 0.0340 | 1.05E-62 | 21.84                         | 3689.60      | 4.36E-242  | 3768.91                 | 1236 | 0.00E+00   | -0.001                           | 0.001 | 3.05E-01   | 1240      |       |
|                | SBP               |            | 0.0134  | 0.0085 | 1.16E-01 |                               |              |            |                         |      |            |                                  |       |            |           | 9.01  |
|                | DBP               |            | 0.0106  | 0.0145 | 4.65E-01 |                               |              |            |                         |      |            |                                  |       |            |           | 8.81  |
|                | Education         | MVMR-Egger | -0.4840 | 0.1190 | 0.00E+00 | 0.00E+00                      |              |            |                         |      |            |                                  |       |            |           |       |
|                | SBP               |            | 0.0130  | 0.0080 | 1.14E-01 |                               |              |            |                         |      |            |                                  |       |            |           |       |
|                | DBP               |            | 0.0100  | 0.0140 | 4.71E-01 |                               |              |            |                         |      |            |                                  |       |            |           |       |
| T2D=EA+SBP+PA  | Education         | MV-IVW     | -0.5786 | 0.0339 | 1.08E-58 | 22.61                         | 3488.86      | 3.75E-214  | 3690.97                 | 1233 | 0.00E+00   | -0.001                           | 0.001 | 3.81E-01   | 1237      |       |
|                | SBP               |            | 0.0180  | 0.0045 | 6.17E-05 |                               |              |            |                         |      |            |                                  |       |            |           | 10.27 |
|                | Physical activity |            | -0.2696 | 0.0524 | 3.15E-07 |                               |              |            |                         |      |            |                                  |       |            |           | 1.82  |
|                | Education         | MVMR-Egger | -0.4790 | 0.1180 | 0.00E+00 | 0.00E+00                      |              |            |                         |      |            |                                  |       |            |           |       |
|                | SBP               |            | 0.0180  | 0.0040 | 0.00E+00 |                               |              |            |                         |      |            |                                  |       |            |           |       |
|                | Physical activity |            | -0.2680 | 0.0520 | 0.00E+00 |                               |              |            |                         |      |            |                                  |       |            |           |       |
| T2D=EA+BMI+TV  | Education         | MV-IVW     | -0.1454 | 0.0566 | 1.03E-02 | 23.05                         | 2783.06      | 9.84E-118  | 3017.88                 | 1253 | 0.00E+00   | -0.001                           | 0.001 | 3.92E-01   | 1257      |       |
|                | BMI               |            | 0.9793  | 0.0578 | 3.26E-58 |                               |              |            |                         |      |            |                                  |       |            |           | 16.23 |
|                | TV watching       |            | 0.2472  | 0.0808 | 2.28E-03 |                               |              |            |                         |      |            |                                  |       |            |           | 2.22  |
|                | Education         | MVMR-Egger | -0.0610 | 0.1140 | 5.96E-01 | 0.00E+00                      |              |            |                         |      |            |                                  |       |            |           |       |
|                | BMI               |            | 0.9780  | 0.0580 | 0.00E+00 |                               |              |            |                         |      |            |                                  |       |            |           |       |
|                | TV watching       |            | 0.2490  | 0.0810 | 2.00E-03 |                               |              |            |                         |      |            |                                  |       |            |           |       |
| T2D=EA+BMI+SI  | Education         | MV-IVW     | -0.2627 | 0.0396 | 4.61E-11 | 21.90                         | 2770.84      | 2.59E-117  | 3013.56                 | 1247 | 0.00E+00   | -0.001                           | 0.001 | 4.65E-01   | 1251      |       |
|                | BMI               |            | 1.0255  | 0.0566 | 2.99E-65 |                               |              |            |                         |      |            |                                  |       |            |           | 16.99 |
|                | Smoking           |            | 0.0314  | 0.0456 | 4.92E-01 |                               |              |            |                         |      |            |                                  |       |            |           | 2.91  |
|                | Education         | MVMR-Egger | -0.1910 | 0.1060 | 7.00E-02 | 0.00E+00                      |              |            |                         |      |            |                                  |       |            |           |       |
|                | BMI               |            | 1.0250  | 0.0570 | 0.00E+00 |                               |              |            |                         |      |            |                                  |       |            |           |       |
|                | Smoking           |            | 0.0310  | 0.0460 | 5.03E-01 |                               |              |            |                         |      |            |                                  |       |            |           |       |
| T2D=EA+BMI+SBP | Education         | MV-IVW     | -0.2307 | 0.0359 | 1.92E-10 | 21.58                         | 2659.42      | 1.59E-106  | 2934.64                 | 1233 | 0.00E+00   | -0.001                           | 0.001 | 4.47E-01   | 1237      |       |
|                | BMI               |            | 1.0487  | 0.0559 | 3.28E-69 |                               |              |            |                         |      |            |                                  |       |            |           | 17.16 |
|                | SBP               |            | 0.0239  | 0.0040 | 2.95E-09 |                               |              |            |                         |      |            |                                  |       |            |           | 15.21 |
|                | Education         | MVMR-Egger | -0.1540 | 0.1070 | 1.50E-01 | 0.00E+00                      |              |            |                         |      |            |                                  |       |            |           |       |
|                | BMI               |            | 1.0480  | 0.0560 | 0.00E+00 |                               |              |            |                         |      |            |                                  |       |            |           |       |
|                | SBP               |            | 0.0240  | 0.0040 | 0.00E+00 |                               |              |            |                         |      |            |                                  |       |            |           |       |
| T2D=EA+BMI+PA  | Education         | MV-IVW     | -0.2808 | 0.0350 | 2.57E-15 | 23.86                         | 2781.04      | 3.47E-118  | 3027.19                 | 1249 | 0.00E+00   | -0.001                           | 0.001 | 4.24E-01   | 1253      |       |
|                | BMI               |            | 0.9999  | 0.0574 | 4.54E-61 |                               |              |            |                         |      |            |                                  |       |            |           | 16.32 |
|                | Physical activity |            | -0.1021 | 0.0480 | 3.38E-02 |                               |              |            |                         |      |            |                                  |       |            |           | 1.73  |
|                | Education         | MVMR-Egger | -0.2010 | 0.1050 | 5.60E-02 | 0.00E+00                      |              |            |                         |      |            |                                  |       |            |           |       |
|                | BMI               |            | 0.9990  | 0.0570 | 0.00E+00 |                               |              |            |                         |      |            |                                  |       |            |           |       |
|                | Physical activity |            | -0.1010 | 0.0480 | 3.60E-02 |                               |              |            |                         |      |            |                                  |       |            |           |       |
| T2D=EA+BMI+DBP | Education         | MV-IVW     | -0.2430 | 0.0356 | 1.41E-11 | 22.52                         | 2662.03      | 5.23E-108  | 2927.59                 | 1226 | 0.00E+00   | -0.001                           | 0.001 | 4.89E-01   | 1230      |       |
|                | BMI               |            | 1.0448  | 0.0562 | 3.43E-68 |                               |              |            |                         |      |            |                                  |       |            |           | 13.20 |
|                | DBP               |            | 0.0359  | 0.0069 | 2.00E-07 |                               |              |            |                         |      |            |                                  |       |            |           | 9.46  |
|                | Education         | MVMR-Egger | -0.1730 | 0.1070 | 1.05E-01 | 0.00E+00                      |              |            |                         |      |            |                                  |       |            |           |       |
|                | BMI               |            | 1.0440  | 0.0560 | 0.00E+00 |                               |              |            |                         |      |            |                                  |       |            |           |       |
|                | DBP               |            | 0.0360  | 0.0070 | 0.00E+00 |                               |              |            |                         |      |            |                                  |       |            |           |       |
| T2D=EA+BMI+DBP | Education         | MV-IVW     | -0.2430 | 0.0356 | 1.41E-11 | 22.52                         | 2662.03      | 5.23E-108  | 2927.59                 | 1226 | 0.00E+00   | -0.001                           | 0.001 | 4.89E-01   | 1230      |       |
|                | BMI               |            | 1.0448  | 0.0562 | 3.43E-68 |                               |              |            |                         |      |            |                                  |       |            |           | 13.20 |
|                | DBP               |            | 0.0359  | 0.0069 | 2.00E-07 |                               |              |            |                         |      |            |                                  |       |            |           | 9.46  |
|                | Education         | MVMR-Egger | -0.1730 | 0.1070 | 1.05E-01 | 0.00E+00                      |              |            |                         |      |            |                                  |       |            |           |       |
|                | BMI               |            | 1.0440  | 0.0560 | 0.00E+00 |                               |              |            |                         |      |            |                                  |       |            |           |       |
|                | DBP               |            | 0.0360  | 0.0070 | 0.00E+00 |                               |              |            |                         |      |            |                                  |       |            |           |       |

ESM Table 5c. MVMR sensitivity analysis of combined mediating effect after adjusting for three mediators

| Model              | Variable          | Method | $\beta$ | SE     | $p$      | MVMR Instrument validity test |              |            | MVMR Heterogeneity test |      |            | MVMR directional pleiotropy test |       |            | N of SNPs |  |
|--------------------|-------------------|--------|---------|--------|----------|-------------------------------|--------------|------------|-------------------------|------|------------|----------------------------------|-------|------------|-----------|--|
|                    |                   |        |         |        |          | Conditional F-statistics      | Q statistics | $p$ -value | Q statistic             | Q df | $p$ -value | Egger intercept                  | SE    | $p$ -value |           |  |
| T2D=EA+SI+TV+PA    | Education         |        | -0.2313 | 0.0661 | 4.84E-04 | 22.54                         |              |            |                         |      |            |                                  |       |            |           |  |
|                    | Smoking           | MV-    | 0.1279  | 0.0497 | 1.01E-02 | 2.95                          |              |            |                         |      |            |                                  |       |            |           |  |
|                    | TV watching       | IVW    | 0.5226  | 0.0884 | 4.37E-09 | 2.19                          |              |            |                         |      |            |                                  |       |            |           |  |
|                    | Physical activity |        | -0.2150 | 0.0527 | 4.78E-05 | 1.70                          |              |            |                         |      |            |                                  |       |            |           |  |
|                    | Education         |        | -0.1220 | 0.1280 | 3.41E-01 |                               | 3404.42      | 1.35E-200  | 3610.14                 | 1241 | 0.00E+00   | -0.001                           | 0.001 | 3.21E-01   | 1246      |  |
|                    | Smoking           | MVMR-  | 0.1270  | 0.0500 | 1.10E-02 |                               |              |            |                         |      |            |                                  |       |            |           |  |
| T2D=EA+BMI+TV+PA   | TV watching       | Egger  | 0.5250  | 0.0880 | 0.00E+00 |                               |              |            |                         |      |            |                                  |       |            |           |  |
|                    | Physical activity |        | -0.2130 | 0.0530 | 0.00E+00 |                               |              |            |                         |      |            |                                  |       |            |           |  |
|                    | Education         |        | -0.1559 | 0.0571 | 6.46E-03 | 22.80                         |              |            |                         |      |            |                                  |       |            |           |  |
|                    | BMI               | MV-    | 0.9641  | 0.0587 | 4.38E-55 | 15.69                         |              |            |                         |      |            |                                  |       |            |           |  |
|                    | TV watching       | IVW    | 0.2264  | 0.0820 | 5.84E-03 | 2.14                          |              |            |                         |      |            |                                  |       |            |           |  |
|                    | Physical activity |        | -0.0818 | 0.0485 | 9.16E-02 | 1.66                          | 2774.90      | 1.26E-117  | 3008.53                 | 1248 | 0.00E+00   | -0.001                           | 0.001 | 3.83E-01   | 1253      |  |
| T2D=EA+BMI+SI+TV   | Education         |        | -0.0680 | 0.1150 | 5.53E-01 |                               |              |            |                         |      |            |                                  |       |            |           |  |
|                    | BMI               | MVMR-  | 0.9630  | 0.0590 | 0.00E+00 |                               |              |            |                         |      |            |                                  |       |            |           |  |
|                    | TV watching       | Egger  | 0.2280  | 0.0820 | 5.00E-03 |                               |              |            |                         |      |            |                                  |       |            |           |  |
|                    | Physical activity |        | -0.0810 | 0.0480 | 9.70E-02 |                               |              |            |                         |      |            |                                  |       |            |           |  |
|                    | Education         |        | -0.1265 | 0.0598 | 3.46E-02 | 22.89                         |              |            |                         |      |            |                                  |       |            |           |  |
|                    | BMI               | MV-    | 0.9782  | 0.0585 | 7.50E-57 | 15.97                         |              |            |                         |      |            |                                  |       |            |           |  |
| T2D=EA+BMI+SI+PA   | Smoking           | IVW    | 0.0323  | 0.0455 | 4.77E-01 | 2.92                          |              |            |                         |      |            |                                  |       |            |           |  |
|                    | TV watching       |        | 0.2486  | 0.0812 | 2.24E-03 | 2.21                          | 2757.14      | 5.06E-116  | 2989.95                 | 1245 | 0.00E+00   | -0.001                           | 0.001 | 4.29E-01   | 1250      |  |
|                    | Education         |        | -0.0480 | 0.1150 | 6.75E-01 |                               |              |            |                         |      |            |                                  |       |            |           |  |
|                    | BMI               | MVMR-  | 0.9770  | 0.0580 | 0.00E+00 |                               |              |            |                         |      |            |                                  |       |            |           |  |
|                    | Smoking           | Egger  | 0.0310  | 0.0450 | 4.89E-01 |                               |              |            |                         |      |            |                                  |       |            |           |  |
|                    | TV watching       |        | 0.2500  | 0.0810 | 2.00E-03 |                               |              |            |                         |      |            |                                  |       |            |           |  |
| T2D=EA+BMI+SI+PA   | Education         |        | -0.2638 | 0.0396 | 4.23E-11 | 17.02                         |              |            |                         |      |            |                                  |       |            |           |  |
|                    | BMI               | MV-    | 0.9988  | 0.0581 | 1.31E-59 | 16.05                         |              |            |                         |      |            |                                  |       |            |           |  |
|                    | Smoking           | IVW    | 0.0299  | 0.0457 | 5.13E-01 | 2.91                          |              |            |                         |      |            |                                  |       |            |           |  |
|                    | Physical activity |        | -0.1034 | 0.0481 | 3.19E-02 | 1.72                          | 2755.59      | 1.57E-116  | 2999.10                 | 1241 | 0.00E+00   | -0.001                           | 0.001 | 4.66E-01   | 1246      |  |
|                    | Education         |        | -0.1920 | 0.1070 | 7.20E-02 |                               |              |            |                         |      |            |                                  |       |            |           |  |
|                    | BMI               | MVMR-  | 0.9980  | 0.0580 | 0.00E+00 |                               |              |            |                         |      |            |                                  |       |            |           |  |
| T2D=EA+BMI+SBP+TV  | Smoking           | Egger  | 0.0290  | 0.0460 | 5.25E-01 |                               |              |            |                         |      |            |                                  |       |            |           |  |
|                    | Physical activity |        | -0.1020 | 0.0480 | 3.30E-02 |                               |              |            |                         |      |            |                                  |       |            |           |  |
|                    | Education         |        | -0.1311 | 0.0567 | 2.10E-02 | 23.01                         |              |            |                         |      |            |                                  |       |            |           |  |
|                    | BMI               | MV-    | 1.0150  | 0.0578 | 8.14E-62 | 15.84                         |              |            |                         |      |            |                                  |       |            |           |  |
|                    | SBP               | IVW    | 0.0230  | 0.0040 | 1.43E-08 | 9.03                          |              |            |                         |      |            |                                  |       |            |           |  |
|                    | TV watching       |        | 0.1841  | 0.0812 | 2.36E-02 | 2.20                          | 2659.26      | 1.13E-106  | 2922.26                 | 1232 | 0.00E+00   | -0.001                           | 0.001 | 4.14E-01   | 1237      |  |
| T2D=EA+BMI+SBP+TV  | Education         |        | -0.0480 | 0.1160 | 6.79E-01 |                               |              |            |                         |      |            |                                  |       |            |           |  |
|                    | BMI               | MVMR-  | 1.0140  | 0.0580 | 0.00E+00 |                               |              |            |                         |      |            |                                  |       |            |           |  |
|                    | SBP               | Egger  | 0.0230  | 0.0040 | 0.00E+00 |                               |              |            |                         |      |            |                                  |       |            |           |  |
|                    | TV watching       |        | 0.1860  | 0.0810 | 2.20E-02 |                               |              |            |                         |      |            |                                  |       |            |           |  |
|                    | Education         |        | -0.2023 | 0.0407 | 7.85E-07 | 16.46                         |              |            |                         |      |            |                                  |       |            |           |  |
|                    | BMI               | MV-    | 1.0440  | 0.0566 | 2.61E-67 | 14.81                         |              |            |                         |      |            |                                  |       |            |           |  |
| T2D=EA+BMI+SBP+SI  | SBP               | IVW    | 0.0240  | 0.0040 | 3.42E-09 | 10.15                         |              |            |                         |      |            |                                  |       |            |           |  |
|                    | Smoking           |        | 0.0581  | 0.0456 | 2.03E-01 | 2.90                          | 2635.24      | 4.83E-105  | 2907.50                 | 1225 | 0.00E+00   | -0.001                           | 0.001 | 5.00E-01   | 1230      |  |
|                    | Education         |        | -0.1350 | 0.1080 | 2.12E-01 |                               |              |            |                         |      |            |                                  |       |            |           |  |
|                    | BMI               | MVMR-  | 1.0430  | 0.0570 | 0.00E+00 |                               |              |            |                         |      |            |                                  |       |            |           |  |
|                    | SBP               | Egger  | 0.0240  | 0.0040 | 0.00E+00 |                               |              |            |                         |      |            |                                  |       |            |           |  |
|                    | Smoking           |        | 0.0570  | 0.0460 | 2.10E-01 |                               |              |            |                         |      |            |                                  |       |            |           |  |
| T2D=EA+BMI+SBP+PA  | Education         |        | -0.2314 | 0.0359 | 1.62E-10 | 21.54                         |              |            |                         |      |            |                                  |       |            |           |  |
|                    | BMI               | MV-    | 1.0261  | 0.0571 | 3.07E-64 | 16.19                         |              |            |                         |      |            |                                  |       |            |           |  |
|                    | SBP               | IVW    | 0.0237  | 0.0040 | 4.48E-09 | 9.16                          |              |            |                         |      |            |                                  |       |            |           |  |
|                    | Physical activity |        | -0.0903 | 0.0477 | 5.89E-02 | 1.73                          | 2652.10      | 7.72E-106  | 2926.32                 | 1232 | 0.00E+00   | -0.001                           | 0.001 | 4.75E-01   | 1237      |  |
|                    | Education         |        | -0.1590 | 0.1070 | 1.36E-01 |                               |              |            |                         |      |            |                                  |       |            |           |  |
|                    | BMI               | MVMR-  | 1.0250  | 0.0570 | 0.00E+00 |                               |              |            |                         |      |            |                                  |       |            |           |  |
| T2D=EA+BMI+SBP+PA  | SBP               | Egger  | 0.0240  | 0.0040 | 0.00E+00 |                               |              |            |                         |      |            |                                  |       |            |           |  |
|                    | Physical activity |        | -0.0890 | 0.0480 | 6.10E-02 |                               |              |            |                         |      |            |                                  |       |            |           |  |
|                    | Education         |        | -0.2275 | 0.0360 | 3.75E-10 | 20.48                         |              |            |                         |      |            |                                  |       |            |           |  |
|                    | BMI               | MV-    | 1.0528  | 0.0561 | 3.24E-69 | 14.14                         |              |            |                         |      |            |                                  |       |            |           |  |
|                    | SBP               | IVW    | 0.0201  | 0.0075 | 7.56E-03 | 10.91                         |              |            |                         |      |            |                                  |       |            |           |  |
|                    | DBP               |        | 0.0069  | 0.0128 | 5.88E-01 | 8.89                          | 2644.30      | 4.24E-106  | 2910.54                 | 1225 | 0.00E+00   | -0.001                           | 0.001 | 4.79E-01   | 1230      |  |
| T2D=EA+BMI+SBP+DBP | Education         |        | -0.1560 | 0.1070 | 1.44E-01 |                               |              |            |                         |      |            |                                  |       |            |           |  |
|                    | BMI               | MVMR-  | 1.0520  | 0.0560 | 0.00E+00 |                               |              |            |                         |      |            |                                  |       |            |           |  |
|                    | SBP               | Egger  | 0.0200  | 0.0080 | 7.00E-03 |                               |              |            |                         |      |            |                                  |       |            |           |  |
|                    | DBP               |        | 0.0070  | 0.0130 | 5.92E-01 |                               |              |            |                         |      |            |                                  |       |            |           |  |
|                    | Education         |        | -0.2214 | 0.0403 | 4.87E-08 | 16.77                         |              |            |                         |      |            |                                  |       |            |           |  |
|                    | BMI               | MV-    | 1.0362  | 0.0567 | 3.20E-66 | 12.84                         |              |            |                         |      |            |                                  |       |            |           |  |
| T2D=EA+BMI+DBP+SI  | DBP               | IVW    | 0.0365  | 0.0069 | 1.36E-07 | 9.44                          |              |            |                         |      |            |                                  |       |            |           |  |
|                    | Smoking           |        | 0.0523  | 0.0457 | 2.53E-01 | 2.91                          | 2660.98      | 4.70E-108  | 2924.58                 | 1225 | 0.00E+00   | -0.001                           | 0.001 | 5.11E-01   | 1230      |  |
|                    | Education         |        | -0.1550 | 0.1080 | 1.51E-01 |                               |              |            |                         |      |            |                                  |       |            |           |  |
|                    | BMI               | MVMR-  | 1.0360  | 0.0570 | 0.00E+00 |                               |              |            |                         |      |            |                                  |       |            |           |  |
|                    | DBP               | Egger  | 0.0360  | 0.0070 | 0.00E+00 |                               |              |            |                         |      |            |                                  |       |            |           |  |
|                    | Smoking           |        | 0.0510  | 0.0460 | 2.61E-01 |                               |              |            |                         |      |            |                                  |       |            |           |  |

ESM Table 5d. MVMR sensitivity analysis of combined mediating effect after adjusting for four to six mediators

| Model                    | Variable          | Method     | $\beta$  | SE       | $p$      | MVMR Instrument validity test |              |            | MVMR Heterogeneity test |      | MVMR directional pleiotropy test |                 |       | N of SNPs |            |
|--------------------------|-------------------|------------|----------|----------|----------|-------------------------------|--------------|------------|-------------------------|------|----------------------------------|-----------------|-------|-----------|------------|
|                          |                   |            |          |          |          | Conditional F-statistics      | Q statistics | $p$ -value | Q statistic             | Q df | $p$ -value                       | Egger intercept | SE    |           | $p$ -value |
| T2D=EA+SBP+SI+TV+PA      | Education         | MV-IVW     | -0.2201  | 0.0666   | 9.70E-04 | 12.58                         | 3341.07      | 1.41E-195  | 3552.57                 | 1224 | 0.00E+00                         | -0.001          | 0.001 | 3.67E-01  | 1230       |
|                          | SBP               |            | 0.0168   | 0.0045   | 1.74E-04 | 8.11                          |              |            |                         |      |                                  |                 |       |           |            |
|                          | Smoking           |            | 0.1505   | 0.0501   | 2.71E-03 | 2.94                          |              |            |                         |      |                                  |                 |       |           |            |
|                          | TV watching       |            | 0.4764   | 0.0891   | 1.06E-07 | 2.19                          |              |            |                         |      |                                  |                 |       |           |            |
|                          | Physical activity |            | -0.2144  | 0.0528   | 5.18E-05 | 1.71                          |              |            |                         |      |                                  |                 |       |           |            |
|                          | Education         | MVMR-Egger | -0.1190  | 0.1310   | 3.63E-01 |                               |              |            |                         |      |                                  |                 |       |           |            |
|                          | SBP               |            | 0.0170   | 0.0040   | 0.00E+00 |                               |              |            |                         |      |                                  |                 |       |           |            |
|                          | Smoking           |            | 0.1490   | 0.0500   | 3.00E-03 |                               |              |            |                         |      |                                  |                 |       |           |            |
|                          | TV watching       |            | 0.4790   | 0.0890   | 0.00E+00 |                               |              |            |                         |      |                                  |                 |       |           |            |
|                          | Physical activity |            | -0.2130  | 0.0530   | 0.00E+00 |                               |              |            |                         |      |                                  |                 |       |           |            |
| T2D=EA+BMI+SBP+TV+PA     | Education         | MV-IVW     | -0.1382  | 0.0573   | 1.60E-02 | 12.86                         | 2633.02      | 5.97E-105  | 2892.93                 | 1224 | 0.00E+00                         | -0.001          | 0.001 | 4.66E-01  | 1230       |
|                          | BMI               |            | 1.0031   | 0.0588   | 1.16E-58 | 10.48                         |              |            |                         |      |                                  |                 |       |           |            |
|                          | SBP               |            | 0.0224   | 0.0040   | 3.41E-08 | 7.28                          |              |            |                         |      |                                  |                 |       |           |            |
|                          | TV watching       |            | 0.1649   | 0.0825   | 4.58E-02 | 2.11                          |              |            |                         |      |                                  |                 |       |           |            |
|                          | Physical activity |            | -0.0777  | 0.0483   | 1.08E-01 | 1.67                          |              |            |                         |      |                                  |                 |       |           |            |
|                          | Education         | MVMR-Egger | -0.0640  | 0.1170   | 5.84E-01 |                               |              |            |                         |      |                                  |                 |       |           |            |
|                          | BMI               |            | 1.0020   | 0.0590   | 0.00E+00 |                               |              |            |                         |      |                                  |                 |       |           |            |
|                          | SBP               |            | 0.0220   | 0.0040   | 0.00E+00 |                               |              |            |                         |      |                                  |                 |       |           |            |
|                          | TV watching       |            | 0.1670   | 0.0830   | 4.30E-02 |                               |              |            |                         |      |                                  |                 |       |           |            |
|                          | Physical activity |            | -0.0770  | 0.0480   | 1.13E-01 |                               |              |            |                         |      |                                  |                 |       |           |            |
| T2D=EA+BMI+SBP+SI+TV     | Education         | MV-IVW     | -0.1025  | 0.0600   | 8.76E-02 | 12.79                         | 2634.48      | 4.04E-105  | 2895.20                 | 1224 | 0.00E+00                         | -0.001          | 0.001 | 4.62E-01  | 1230       |
|                          | BMI               |            | 1.0100   | 0.0584   | 4.60E-60 | 10.52                         |              |            |                         |      |                                  |                 |       |           |            |
|                          | SBP               |            | 0.0230   | 0.0040   | 1.71E-08 | 7.97                          |              |            |                         |      |                                  |                 |       |           |            |
|                          | Smoking           |            | 0.0579   | 0.0455   | 2.04E-01 | 2.90                          |              |            |                         |      |                                  |                 |       |           |            |
|                          | TV watching       |            | 0.1846   | 0.0816   | 2.38E-02 | 2.18                          |              |            |                         |      |                                  |                 |       |           |            |
|                          | Education         | MVMR-Egger | -0.0280  | 0.1180   | 8.10E-01 |                               |              |            |                         |      |                                  |                 |       |           |            |
|                          | BMI               |            | 1.0090   | 0.0580   | 0.00E+00 |                               |              |            |                         |      |                                  |                 |       |           |            |
|                          | SBP               |            | 0.0230   | 0.0040   | 0.00E+00 |                               |              |            |                         |      |                                  |                 |       |           |            |
|                          | Smoking           |            | 0.0570   | 0.0460   | 2.12E-01 |                               |              |            |                         |      |                                  |                 |       |           |            |
|                          | TV watching       |            | 0.1860   | 0.0820   | 2.30E-02 |                               |              |            |                         |      |                                  |                 |       |           |            |
| T2D=EA+BMI+SBP+SI+PA     | Education         | MV-IVW     | -0.2034  | 0.0407   | 6.63E-07 | 16.42                         | 2627.73      | 2.47E-104  | 2898.93                 | 1224 | 0.00E+00                         | -0.001          | 0.001 | 5.29E-01  | 1230       |
|                          | BMI               |            | 1.0206   | 0.0578   | 2.43E-62 | 11.96                         |              |            |                         |      |                                  |                 |       |           |            |
|                          | SBP               |            | 0.0237   | 0.0040   | 5.19E-09 | 8.10                          |              |            |                         |      |                                  |                 |       |           |            |
|                          | Smoking           |            | 0.0575   | 0.0456   | 2.07E-01 | 2.90                          |              |            |                         |      |                                  |                 |       |           |            |
|                          | Physical activity |            | -0.0918  | 0.0478   | 5.53E-02 | 1.73                          |              |            |                         |      |                                  |                 |       |           |            |
|                          | Education         | MVMR-Egger | -0.1400  | 0.1080   | 1.93E-01 |                               |              |            |                         |      |                                  |                 |       |           |            |
|                          | BMI               |            | 1.0200   | 0.0580   | 0.00E+00 |                               |              |            |                         |      |                                  |                 |       |           |            |
|                          | SBP               |            | 0.0240   | 0.0040   | 0.00E+00 |                               |              |            |                         |      |                                  |                 |       |           |            |
|                          | Smoking           |            | 0.0570   | 0.0460   | 2.14E-01 |                               |              |            |                         |      |                                  |                 |       |           |            |
|                          | Physical activity |            | -0.0910  | 0.0480   | 5.70E-02 |                               |              |            |                         |      |                                  |                 |       |           |            |
| T2D=EA+BMI+SBP+DBP+TV    | Education         | MV-IVW     | -0.1328  | 0.0569   | 1.98E-02 | 12.91                         | 2664.21      | 2.02E-107  | 2921.96                 | 1231 | 0.00E+00                         | -0.001          | 0.001 | 4.17E-01  | 1237       |
|                          | BMI               |            | 1.0151   | 0.0578   | 8.80E-62 | 11.86                         |              |            |                         |      |                                  |                 |       |           |            |
|                          | SBP               |            | 0.0207   | 0.0075   | 5.87E-03 | 8.90                          |              |            |                         |      |                                  |                 |       |           |            |
|                          | DBP               |            | 0.1819   | 0.0815   | 2.58E-02 | 7.20                          |              |            |                         |      |                                  |                 |       |           |            |
|                          | TV watching       |            | 0.0046   | 0.0128   | 7.18E-01 | 2.18                          |              |            |                         |      |                                  |                 |       |           |            |
|                          | Education         | MVMR-Egger | -0.0500  | 0.1170   | 6.67E-01 |                               |              |            |                         |      |                                  |                 |       |           |            |
|                          | BMI               |            | 1.0140   | 0.0580   | 0.00E+00 |                               |              |            |                         |      |                                  |                 |       |           |            |
|                          | SBP               |            | 0.0210   | 0.0070   | 6.00E-03 |                               |              |            |                         |      |                                  |                 |       |           |            |
|                          | DBP               |            | 0.1830   | 0.0820   | 2.40E-02 |                               |              |            |                         |      |                                  |                 |       |           |            |
|                          | TV watching       |            | 0.0050   | 0.0130   | 7.25E-01 |                               |              |            |                         |      |                                  |                 |       |           |            |
| T2D=EA+BMI+SBP+DBP+SI    | Education         | MV-IVW     | -0.2031  | 0.0408   | 7.27E-07 | 12.04                         | 2642.26      | 4.98E-106  | 2906.82                 | 1224 | 0.00E+00                         | -0.001          | 0.001 | 5.03E-01  | 1230       |
|                          | BMI               |            | 1.0435   | 0.0566   | 3.41E-67 | 10.81                         |              |            |                         |      |                                  |                 |       |           |            |
|                          | SBP               |            | 0.0205   | 0.0075   | 6.37E-03 | 8.90                          |              |            |                         |      |                                  |                 |       |           |            |
|                          | DBP               |            | 0.0070   | 0.0128   | 5.87E-01 | 7.88                          |              |            |                         |      |                                  |                 |       |           |            |
|                          | Smoking           |            | 0.0581   | 0.0456   | 2.03E-01 | 2.90                          |              |            |                         |      |                                  |                 |       |           |            |
|                          | Education         | MVMR-Egger | -0.1360  | 0.1080   | 2.08E-01 |                               |              |            |                         |      |                                  |                 |       |           |            |
|                          | BMI               |            | 1.0430   | 0.0570   | 0.00E+00 |                               |              |            |                         |      |                                  |                 |       |           |            |
|                          | SBP               |            | 0.0210   | 0.0080   | 6.00E-03 |                               |              |            |                         |      |                                  |                 |       |           |            |
|                          | DBP               |            | 0.0070   | 0.0130   | 5.91E-01 |                               |              |            |                         |      |                                  |                 |       |           |            |
|                          | Smoking           |            | 0.0570   | 0.0460   | 2.10E-01 |                               |              |            |                         |      |                                  |                 |       |           |            |
| T2D=EA+BMI+SBP+DBP+SI+TV | Education         | MV-IVW     | -0.1043  | 0.0602   | 8.33E-02 | 12.69                         | 2639.50      | 7.12E-106  | 2894.89                 | 1223 | 0.00E+00                         | -0.001          | 0.001 | 4.65E-01  | 1230       |
|                          | BMI               |            | 1.0101   | 0.0585   | 4.99E-60 | 10.55                         |              |            |                         |      |                                  |                 |       |           |            |
|                          | SBP               |            | 0.0206   | 0.0075   | 6.03E-03 | 8.90                          |              |            |                         |      |                                  |                 |       |           |            |
|                          | DBP               |            | 0.0047   | 0.0128   | 7.12E-01 | 7.88                          |              |            |                         |      |                                  |                 |       |           |            |
|                          | Smoking           |            | 0.0579   | 0.0456   | 2.04E-01 | 2.89                          |              |            |                         |      |                                  |                 |       |           |            |
|                          | TV watching       | 0.1823     | 0.0819   | 2.62E-02 | 2.17     |                               |              |            |                         |      |                                  |                 |       |           |            |
|                          | Education         | MVMR-Egger | -0.0300  | 0.1180   | 7.97E-01 |                               |              |            |                         |      |                                  |                 |       |           |            |
|                          | BMI               |            | 1.0090   | 0.0580   | 0.00E+00 |                               |              |            |                         |      |                                  |                 |       |           |            |
|                          | SBP               |            | 0.0210   | 0.0080   | 6.00E-03 |                               |              |            |                         |      |                                  |                 |       |           |            |
|                          | DBP               |            | 0.0050   | 0.0130   | 7.17E-01 |                               |              |            |                         |      |                                  |                 |       |           |            |
| Smoking                  | 0.0570            |            | 0.0460   | 2.12E-01 |          |                               |              |            |                         |      |                                  |                 |       |           |            |
| TV watching              | 0.1840            | 0.0820     | 2.50E-02 |          |          |                               |              |            |                         |      |                                  |                 |       |           |            |
| T2D=EA+BMI+SBP+DBP+SI+PA | Education         | MV-IVW     | -0.2041  | 0.0407   | 6.25E-07 | 12.02                         | 2633.95      | 3.17E-105  | 2898.44                 | 1223 | 0.00E+00                         | -0.001          | 0.001 | 5.31E-01  | 1230       |
|                          | BMI               |            | 1.0204   | 0.0578   | 2.82E-62 | 11.98                         |              |            |                         |      |                                  |                 |       |           |            |
|                          | SBP               |            | 0.0208   | 0.0075   | 5.77E-03 | 8.90                          |              |            |                         |      |                                  |                 |       |           |            |
|                          | DBP               |            | 0.0059   | 0.0128   | 6.44E-01 | 7.88                          |              |            |                         |      |                                  |                 |       |           |            |
|                          | Smoking           |            | 0.0575   | 0.0456   | 2.07E-01 | 2.90                          |              |            |                         |      |                                  |                 |       |           |            |
|                          | Physical activity | -0.0908    | 0.0479   | 5.82E-02 | 1.72     |                               |              |            |                         |      |                                  |                 |       |           |            |
|                          | Education         | MVMR-Egger | -0.1410  | 0.1080   | 1.91E-01 |                               |              |            |                         |      |                                  |                 |       |           |            |
|                          | BMI               |            | 1.0200   | 0.0580   | 0.00E+00 |                               |              |            |                         |      |                                  |                 |       |           |            |
|                          | SBP               |            | 0.0210   | 0.0080   | 6.00E-03 |                               |              |            |                         |      |                                  |                 |       |           |            |
|                          | DBP               |            | 0.0060   | 0.0130   | 6.47E-01 |                               |              |            |                         |      |                                  |                 |       |           |            |
| Smoking                  | 0.0570            |            | 0.0460   | 2.14E-01 |          |                               |              |            |                         |      |                                  |                 |       |           |            |
| Physical activity        | -0.0900           | 0.0480     | 6.00E-02 |          |          |                               |              |            |                         |      |                                  |                 |       |           |            |

| T2D=EA+BMI+SBP+DBP+SI+TV+PA |                   |                |         |        |          |       |         |           |         |      |          |        |       |          |
|-----------------------------|-------------------|----------------|---------|--------|----------|-------|---------|-----------|---------|------|----------|--------|-------|----------|
|                             | Education         |                | -0.1157 | 0.0606 | 5.65E-02 | 11.60 |         |           |         |      |          |        |       |          |
|                             | BMI               |                | 0.9941  | 0.0593 | 5.62E-57 | 10.30 |         |           |         |      |          |        |       |          |
|                             | SBP               |                | 0.0208  | 0.0075 | 5.58E-03 | 8.90  |         |           |         |      |          |        |       |          |
|                             | DBP               | MV-IVW         | 0.0041  | 0.0128 | 7.50E-01 | 7.79  |         |           |         |      |          |        |       |          |
|                             | Smoking           |                | 0.0574  | 0.0455 | 2.08E-01 | 2.88  |         |           |         |      |          |        |       |          |
|                             | TV watching       |                | 0.1629  | 0.0827 | 4.91E-02 | 2.10  |         |           |         |      |          |        |       |          |
|                             | Physical activity |                | -0.0768 | 0.0484 | 1.13E-01 | 1.67  |         |           |         |      |          |        |       |          |
|                             | Education         |                | -0.0460 | 0.1180 | 6.97E-01 |       | 2634.74 | 1.74E-105 | 2889.08 | 1222 | 0.00E+00 | -0.001 | 0.001 | 4.91E-01 |
|                             | BMI               |                | 0.9930  | 0.0590 | 0.00E+00 |       |         |           |         |      |          |        |       |          |
|                             | SBP               |                | 0.0210  | 0.0080 | 5.00E-03 |       |         |           |         |      |          |        |       |          |
|                             | DBP               | MVMR-<br>Egger | 0.0040  | 0.0130 | 7.54E-01 |       |         |           |         |      |          |        |       |          |
|                             | Smoking           |                | 0.0560  | 0.0460 | 2.15E-01 |       |         |           |         |      |          |        |       |          |
|                             | TV watching       |                | 0.1650  | 0.0830 | 4.70E-02 |       |         |           |         |      |          |        |       |          |
|                             | Physical activity |                | -0.0760 | 0.0480 | 1.17E-01 |       |         |           |         |      |          |        |       |          |

ESM Table 6. Reverse MR analysis of mediators to education attainment

| Exposure          | Outcome | Method          | Unit of MR estimated $\beta$    | MR results     |               |                 | Heterogeneity test |                   | Directional pleiotropy test |                 | N of SNPs |                                           |                                |                 |                   |
|-------------------|---------|-----------------|---------------------------------|----------------|---------------|-----------------|--------------------|-------------------|-----------------------------|-----------------|-----------|-------------------------------------------|--------------------------------|-----------------|-------------------|
|                   |         |                 |                                 | $\beta$        | SE            | <i>p</i> -value | Q statistic        | Q <i>p</i> -value | Egger intercept             | <i>p</i> -value | Original  | LD clumping (r <sup>2</sup> <0.001, 10Mb) | <i>p</i> < 5 x10 <sup>-8</sup> | SNPs in outcome | Steiger filtering |
| BMI               | EA      | MR Egger        | SD (4.2 years of schooling) per | -0.0257        | 0.0405        | 5.26E-01        | 1888.54            | 4.46E-232         | -0.0017                     | 1.66E-02        |           |                                           |                                |                 |                   |
|                   |         | Weighted median | kg/m <sup>2</sup>               | -0.0844        | 0.0140        | 1.79E-09        | NA                 | NA                |                             |                 | 941       | 335                                       | 304                            | 304             | 301               |
|                   |         | <b>IVW</b>      |                                 | <b>-0.1154</b> | <b>0.0161</b> | <b>8.63E-13</b> | 1926.35            | 1.23E-238         |                             |                 |           |                                           |                                |                 |                   |
| SBP               | EA      | MR Egger        | SD (4.2 years of schooling) per | 0.0009         | 0.0025        | 7.20E-01        | 366.46             | 4.06E-30          | -0.0011                     | 2.45E-01        |           |                                           |                                |                 |                   |
|                   |         | Weighted median | mmHg                            | -0.0007        | 0.0009        | 4.30E-01        | NA                 | NA                |                             |                 | 970       | 396                                       | 110                            | 110             | 110               |
|                   |         | <b>IVW</b>      |                                 | <b>-0.0018</b> | <b>0.0009</b> | <b>5.90E-02</b> | 371.15             | 1.42E-30          |                             |                 |           |                                           |                                |                 |                   |
| DBP               | EA      | MR Egger        | SD (4.2 years of schooling) per | -0.0015        | 0.0039        | 6.95E-01        | 331.42             | 7.62E-27          | 0.0004                      | 6.79E-01        |           |                                           |                                |                 |                   |
|                   |         | Weighted median | mmHg                            | 0.0001         | 0.0015        | 9.39E-01        | NA                 | NA                |                             |                 | 962       | 386                                       | 102                            | 102             | 101               |
|                   |         | <b>IVW</b>      |                                 | <b>-0.0001</b> | <b>0.0015</b> | <b>9.73E-01</b> | 332.00             | 1.14E-26          |                             |                 |           |                                           |                                |                 |                   |
| TV watching       | EA      | MR Egger        | SD (4.2 years of schooling) per | -0.5785        | 0.1502        | 2.59E-04        | 379.77             | 1.76E-44          | 0.0012                      | 6.39E-01        |           |                                           |                                |                 |                   |
|                   |         | Weighted median | SD (1.5 hours TV watching)      | -0.4130        | 0.0280        | 4.04E-49        | NA                 | NA                |                             |                 | 152       | 95                                        | 95                             | 85              | 76                |
|                   |         | <b>IVW</b>      |                                 | <b>-0.5094</b> | <b>0.0319</b> | <b>2.40E-57</b> | 380.99             | 2.51E-44          |                             |                 |           |                                           |                                |                 |                   |
| Smoking           | EA      | MR Egger        | SD (4.2 years of schooling) per | -0.1857        | 0.0533        | 6.54E-04        | 450.84             | 4.44E-33          | 0.0012                      | 2.61E-01        |           |                                           |                                |                 |                   |
|                   |         | Weighted median | Log-odds                        | -0.1371        | 0.0146        | 4.55E-21        | NA                 | NA                |                             |                 | 378       | 202                                       | 202                            | 200             | 153               |
|                   |         | <b>IVW</b>      | increase in ever smoking        | <b>-0.1275</b> | <b>0.0137</b> | <b>1.14E-20</b> | 454.80             | 2.03E-33          |                             |                 |           |                                           |                                |                 |                   |
| Physical activity | EA      | MR Egger        | SD (4.2 years of schooling) per | NA             | NA            | NA              | NA                 | NA                | NA                          | NA              |           |                                           |                                |                 |                   |
|                   |         | Weighted median | SD (undefined)                  | NA             | NA            | NA              | NA                 | NA                | NA                          | NA              | 5         | 4                                         | 4                              | 2               | 2                 |
|                   |         | <b>IVW</b>      |                                 | <b>0.0753</b>  | <b>0.1160</b> | <b>5.16E-01</b> | 6.02               | 1.41E-02          | NA                          | NA              |           |                                           |                                |                 |                   |

**ESM Table 7.** Characteristics of 1912 Non-Hispanic white participants from the NHANES 2013-2014 survey

| Characteristic                                                             |                |
|----------------------------------------------------------------------------|----------------|
| Age                                                                        | 55 [42-70]     |
| Sex                                                                        |                |
| Male                                                                       | 909 (48%)      |
| Female                                                                     | 1003 (52%)     |
| Body-mass index (kg/m <sup>2</sup> )                                       | 29.39 ± 6.95   |
| Systolic blood pressure (mmHg)                                             | 123.93 ± 18.05 |
| Diastolic blood pressure (mmHg)                                            | 69.70 ± 12.14  |
| Television watching                                                        |                |
| < 1 hour                                                                   | 216 (11%)      |
| 1 hour                                                                     | 277 (14%)      |
| 2 hours                                                                    | 442 (23%)      |
| 3 hours                                                                    | 349 (18%)      |
| 4 hours                                                                    | 287 (15%)      |
| ≥5 hours                                                                   | 341 (18%)      |
| Smoking                                                                    |                |
| Never smoker                                                               | 914 (48%)      |
| Former smoker                                                              | 579 (30%)      |
| Current smoker                                                             | 419 (22%)      |
| HbA <sub>1c</sub> (%)                                                      | 5.5 [5.2-5.8]  |
| 2h-oral glucose tolerance test (mmol/L)                                    | 6.1 [5.1-7.7]  |
| Fasting glucose (mmol/L)                                                   | 5.6 [5.2-6.1]  |
| Self-reported doctor-diagnosed diabetes                                    |                |
| Yes                                                                        | 242 (13%)      |
| No                                                                         | 1607 (84%)     |
| Borderline                                                                 | 63 (3%)        |
| Taking insulin now                                                         |                |
| Yes                                                                        | 80 (4%)        |
| No                                                                         | 1832 (96%)     |
| Taking glucose lowering pills now                                          |                |
| Yes                                                                        | 179 (9%)       |
| No                                                                         | 233 (12%)      |
| Not available                                                              | 1500 (78%)     |
| Type 2 Diabetes mellitus                                                   |                |
| Yes                                                                        | 334 (17%)      |
| No                                                                         | 1578 (83%)     |
| Highest completed educational level                                        |                |
| Less than 9 <sup>th</sup> grade                                            | 49 (3%)        |
| 9-11 <sup>th</sup> grade (includes 12 <sup>th</sup> grade with no diploma) | 210 (11%)      |
| High school graduate/GED or equivalent                                     | 431 (23%)      |
| Some college or AA degree                                                  | 619 (32%)      |
| College graduate or above                                                  | 603 (32%)      |
| Years of schooling                                                         | 15 [13-20]     |

Characteristics of the 1912 non-Hispanic white participants of the NHANES 2013-2014 survey. Data are presented as mean ± standard deviation, median [interquartile range] in case of non-normal distributions, or n (%) in case of categorical variables.

**ESM Table 8.** Mediation analysis in 1912 Non-Hispanic white participants from the NHANES 2013-2014 survey

| Exposure | Mediator                 | Outcome | a      | se_a  | b      | se_b  | c'     | se_c' | a*b    | se_a*b | c=a*b+c' | Proportion mediated |
|----------|--------------------------|---------|--------|-------|--------|-------|--------|-------|--------|--------|----------|---------------------|
| EA       | BMI (kg/m <sup>2</sup> ) | T2D     | -1.218 | 0.267 | 0.107  | 0.012 | -0.383 | 0.074 | -0.130 | 0.032  | -0.514   | 0.253               |
| EA       | TV (hours)               | T2D     | -0.422 | 0.039 | 0.176  | 0.050 | -0.381 | 0.073 | -0.074 | 0.022  | -0.455   | 0.163               |
| EA       | Smoking (ever vs never)  | T2D     | -0.142 | 0.020 | 0.229  | 0.136 | -0.419 | 0.071 | -0.033 | 0.020  | -0.451   | 0.072               |
| EA       | SBP (mmHg)               | T2D     | -1.608 | 0.518 | 0.012  | 0.004 | -0.438 | 0.069 | -0.020 | 0.009  | -0.458   | 0.044               |
| EA       | DBP (mmHg)               | T2D     | -0.102 | 0.262 | -0.008 | 0.008 | -0.445 | 0.067 | 0.001  | 0.002  | -0.445   | -0.002              |

Single mediator analysis in NHANES 2013-2014.

**a** represents an estimate of the association between EA and mediator, per 4.2 years of schooling in a linear regression model

**b** represents an estimate of the association between mediator and T2D, conditional on EA in a logistic regression model

**c'** represents an estimate of the direct effect between EA and T2D, conditional on the mediator in a logistic regression model

**a\*b** represents an estimate of the indirect effect of the mediator on T2D

**c=a\*b+c'** represents an estimate of the total effect of EA on T2D

**proportion mediated** is calculated by  $a*b / c$

standard errors (se) were calculated using the delta method.

Abbreviations: BMI, body-mass index; DBP, diastolic blood pressure; EA, educational attainment; SBP, systolic blood pressure; T2D, type 2 diabetes; TV, television watching.



**ESM Figure 1.** Directed acyclic graph for 2-step Mendelian randomisation analysis

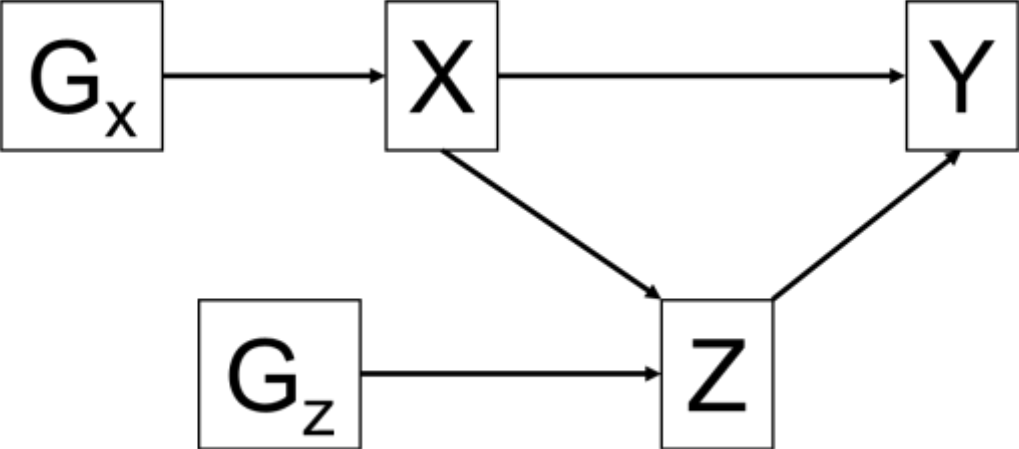

Causal directed acyclic graph illustrating the effect of X on Y through mediation by Z. X is the exposure (education attainment); Y is the outcome (type 2 diabetes) ; Z represents mediators (BMI, SBP, DBP, smoking, TV watching); G<sub>x</sub> and G<sub>z</sub> are genetic instruments of X and Z, respectively.

ESM Figure 2. Directed acyclic graph of tested pathways in NHANES 2013-2014

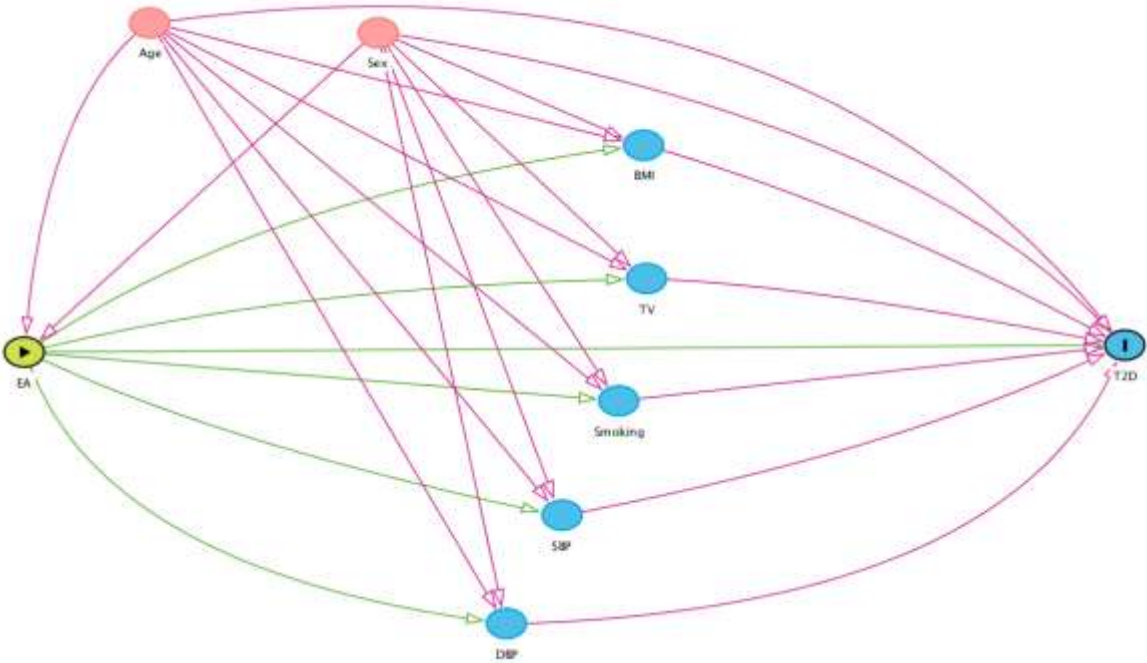

Simplified directed acyclic graph of tested mediation pathways, with mediation by BMI, TV, smoking, SBP, and DBP, whereas age and sex are potential confounders of each relationship. Abbreviations: EA, educational attainment; BMI, body-mass index; TV, television watching; SBP, systolic blood pressure; DBP, diastolic blood pressure; T2D, type 2 diabetes. Drawn using *daggity* software[7].

ESM Figure 3a. Mendelian randomisation scatterplots of education to type 2 diabetes and mediators associations

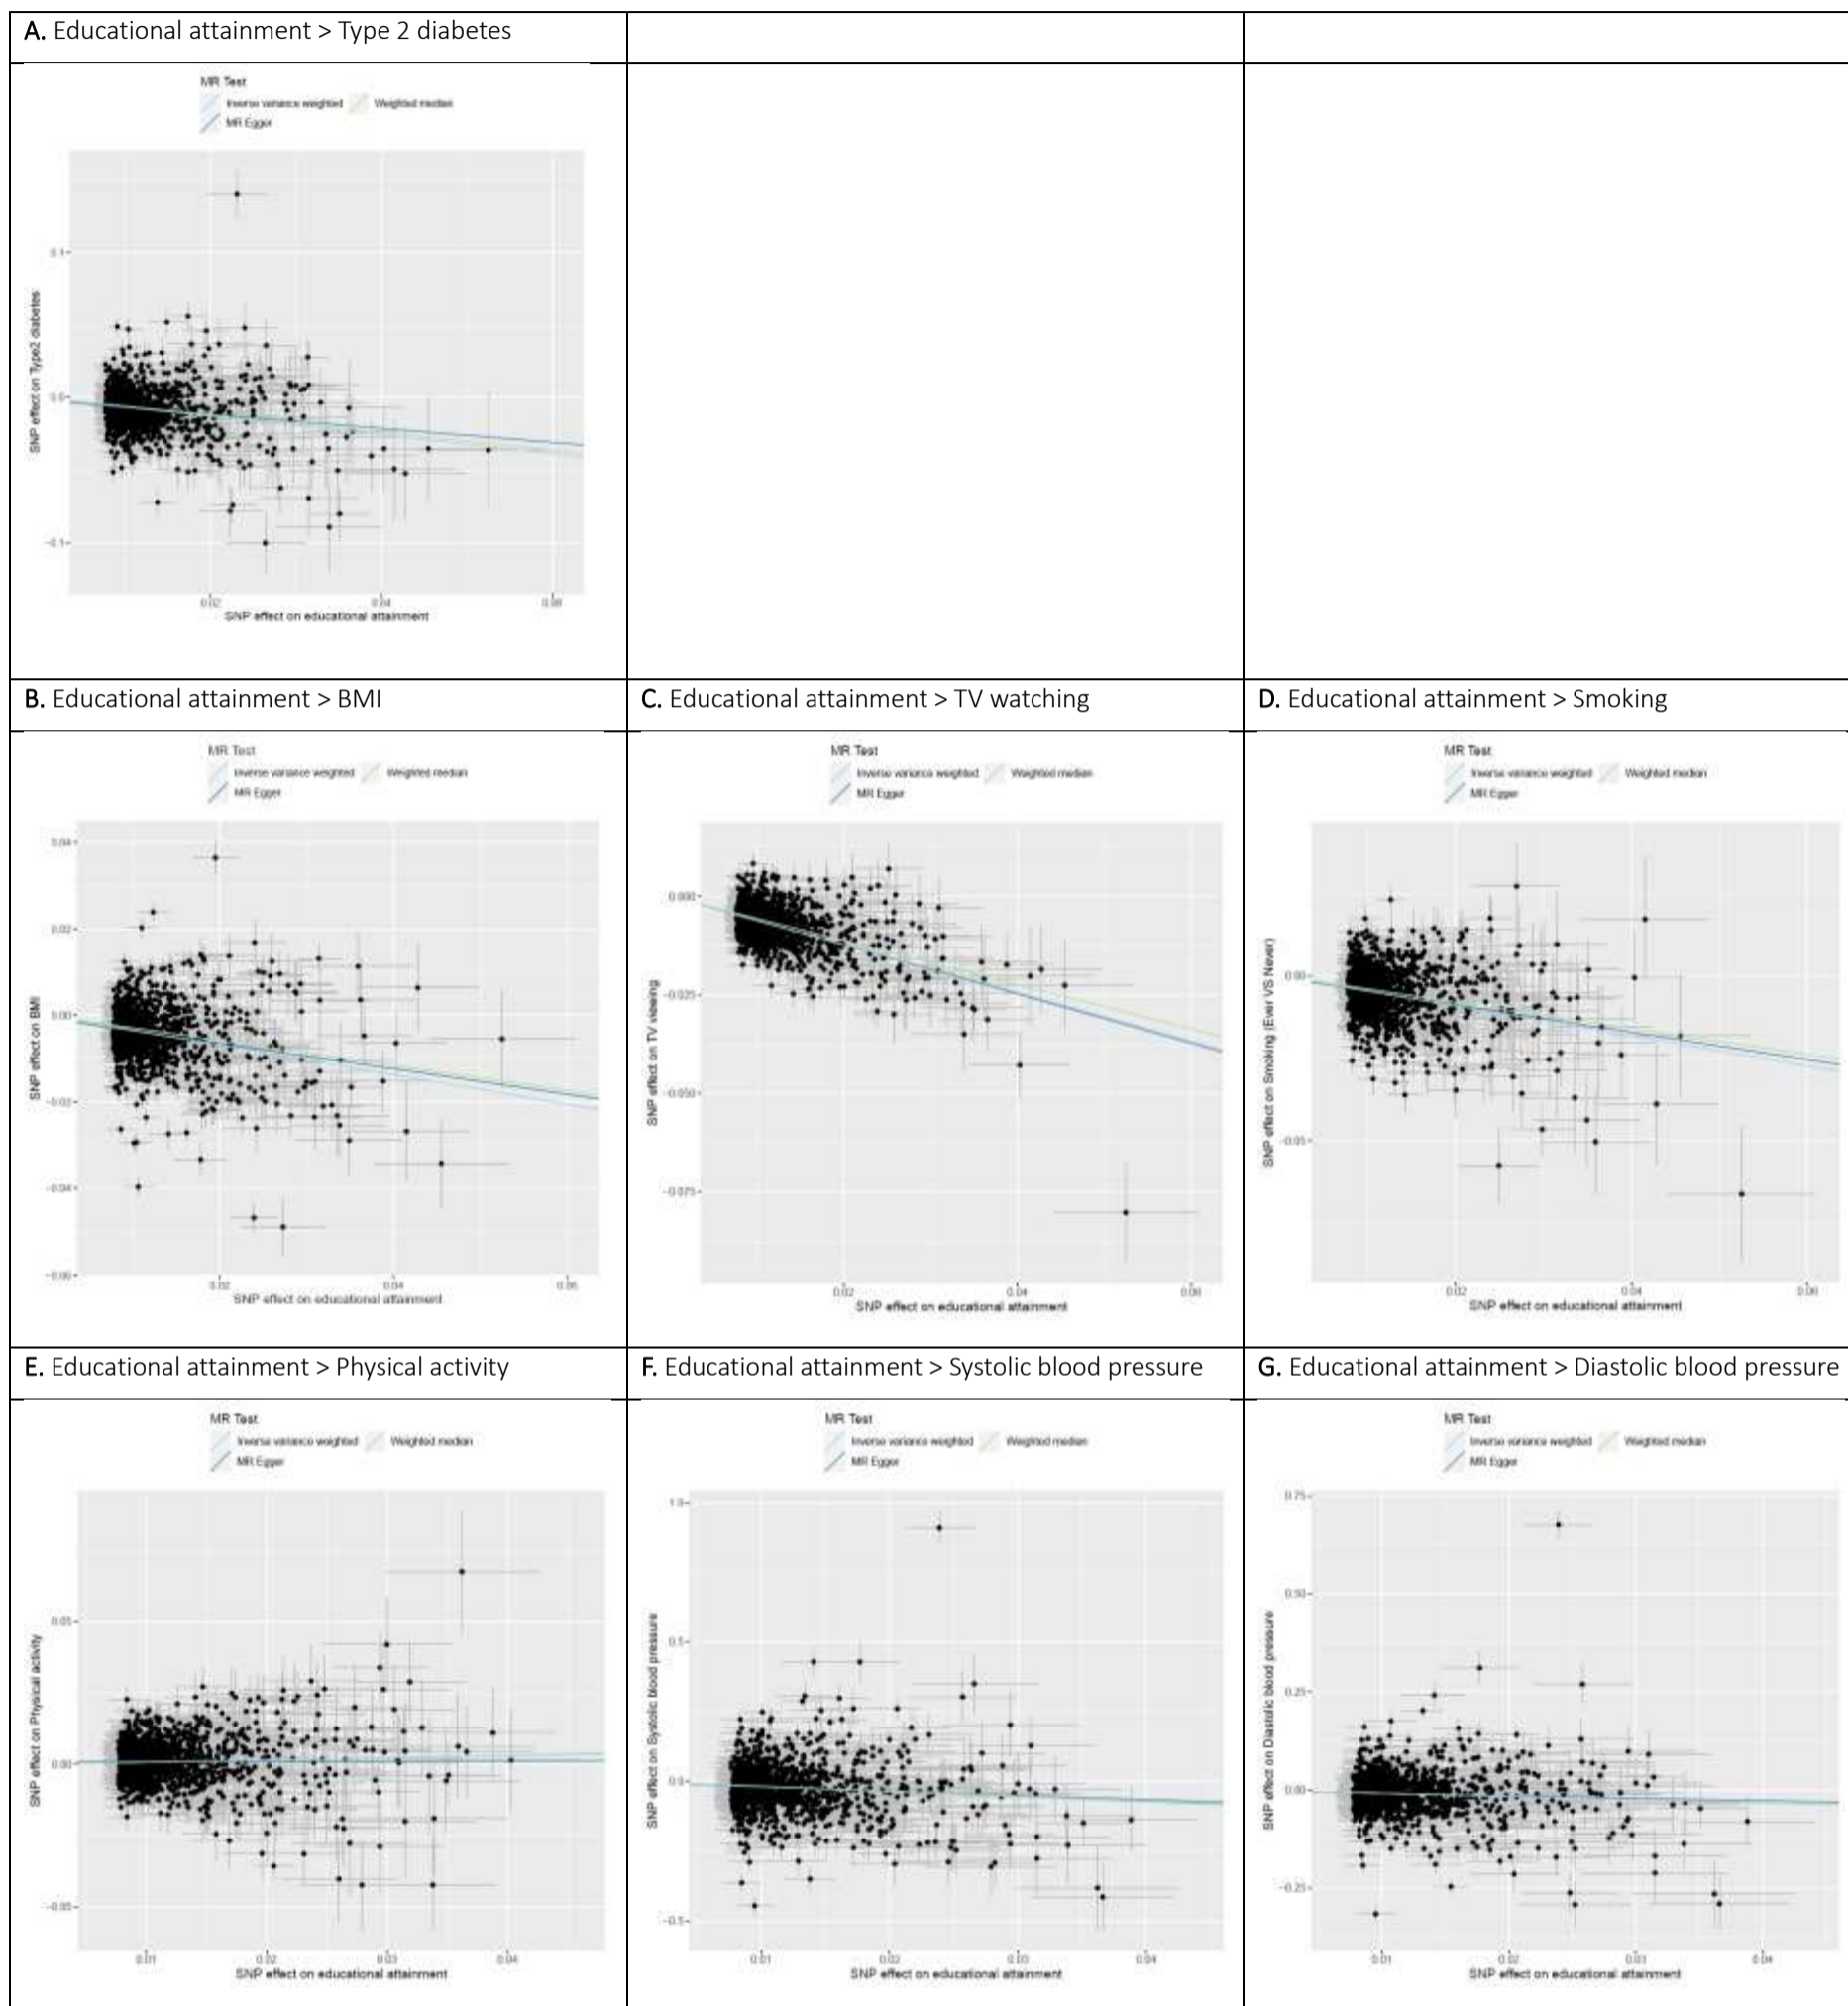

Mendelian randomisation scatterplots. X-axes represent SNP effects on Educational attainment. Y-axes represent SNP effects on (A) Type 2 diabetes, (B) BMI, (C) TV watching, (D) Smoking (ever vs never), (E) Physical activity, (F) Systolic blood pressure, and (G) Diastolic blood pressure. The lines represent pooled estimates of causal effects from inverse variance weighted analysis (lightblue), MR-Egger regression (darkblue), and weighted median analysis (yellow).

**ESM Figure 3b.** Mendelian randomisation scatterplots of mediators to education associations

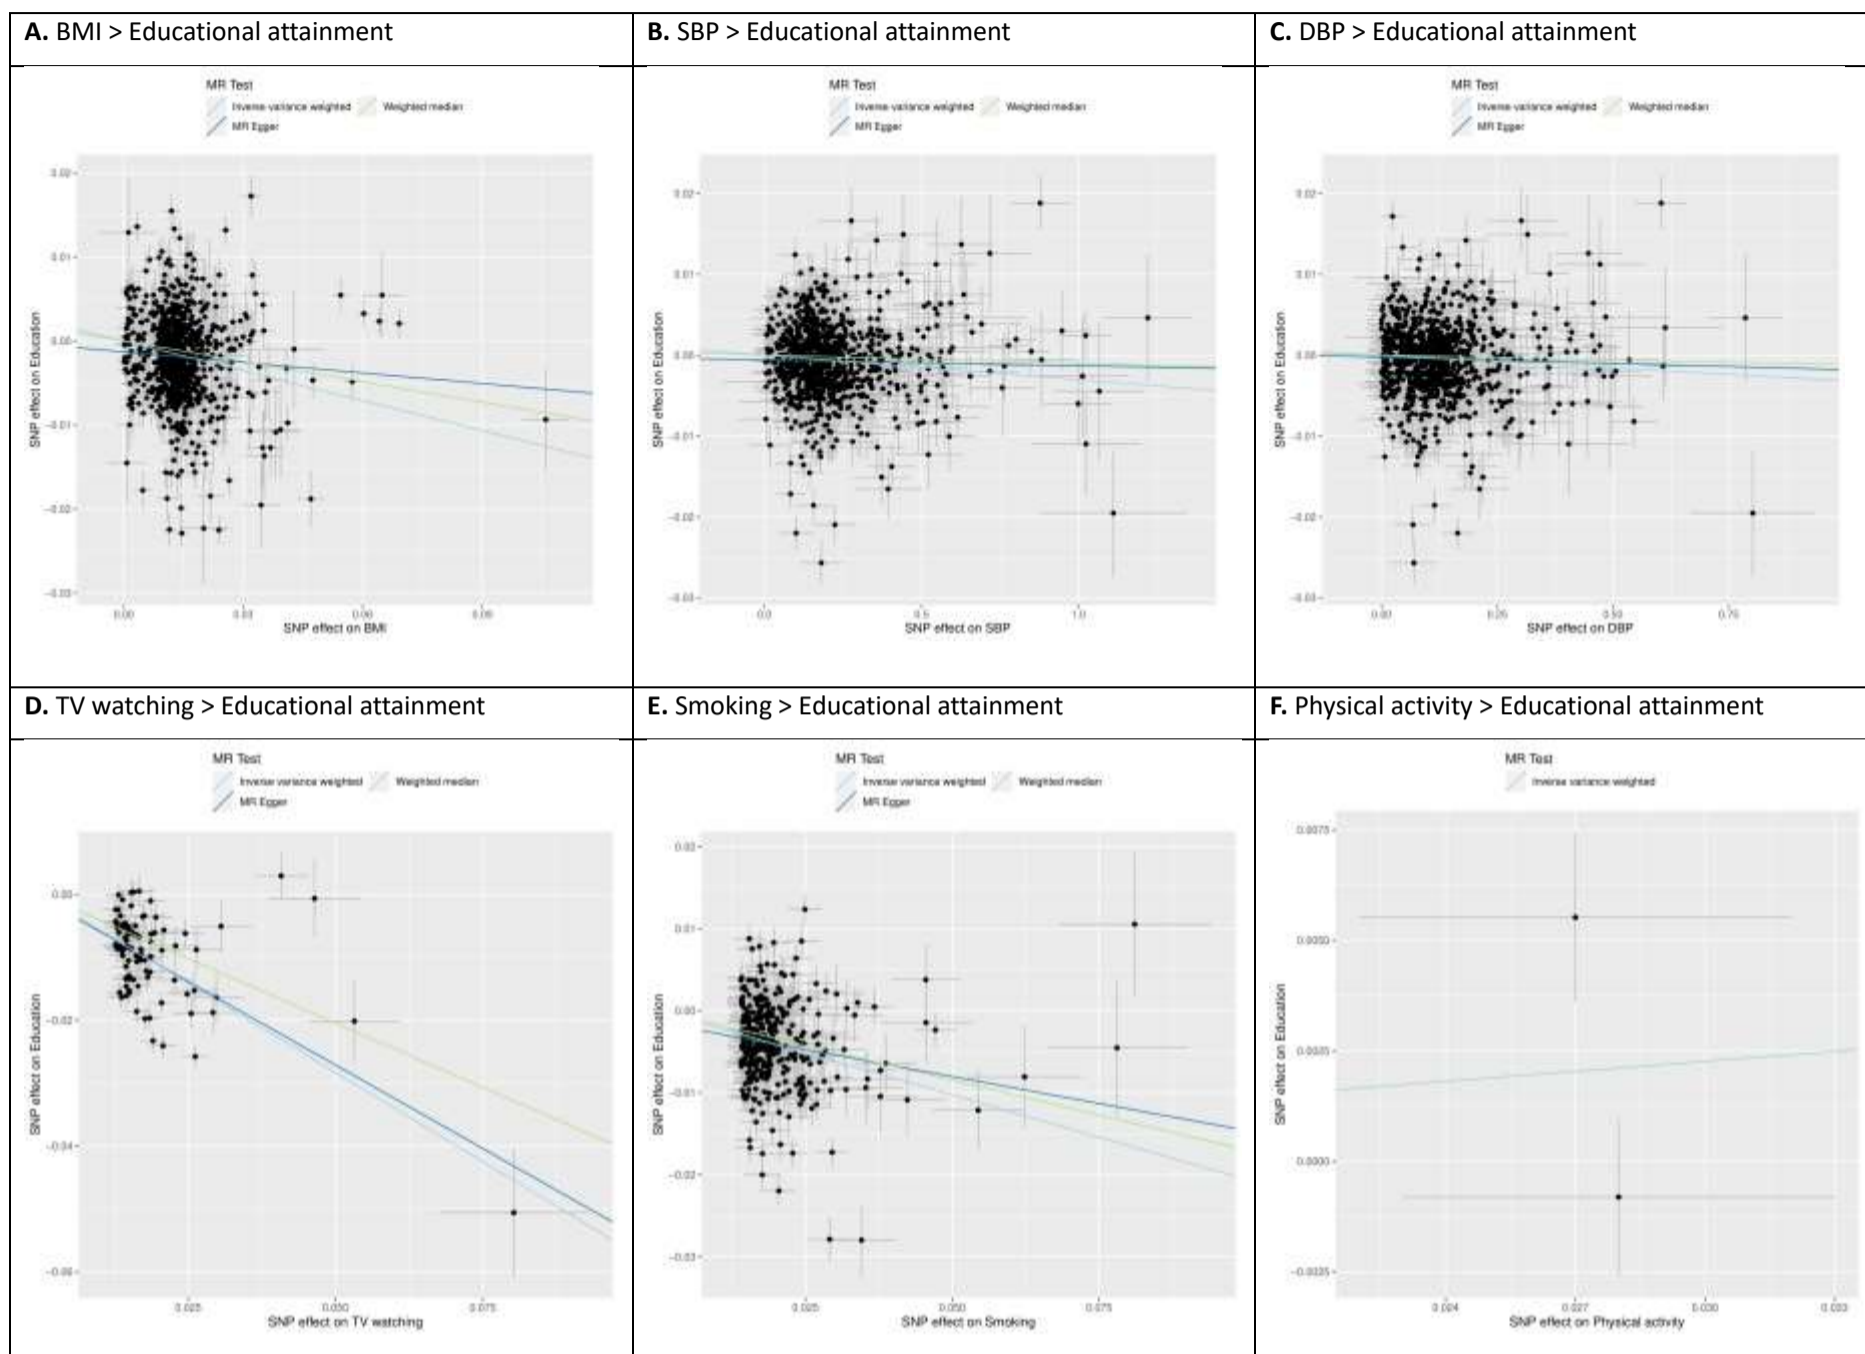

Mendelian randomisation scatterplots. Y-axes represent SNP effects on Educational attainment. X-axes represent SNP effects on (A) BMI, (B) Systolic blood pressure, (C) Diastolic blood pressure, (D) TV watching, (E) Smoking (ever vs never), and (F) Physical activity. The lines represent pooled estimates of causal effects from inverse variance weighted analysis (lightblue), MR-Egger regression (darkblue), and weighted median analysis (yellow).

**ESM Figure 4.** MVMR estimates of the proportion mediated by each mediator separately using the difference in coefficient method

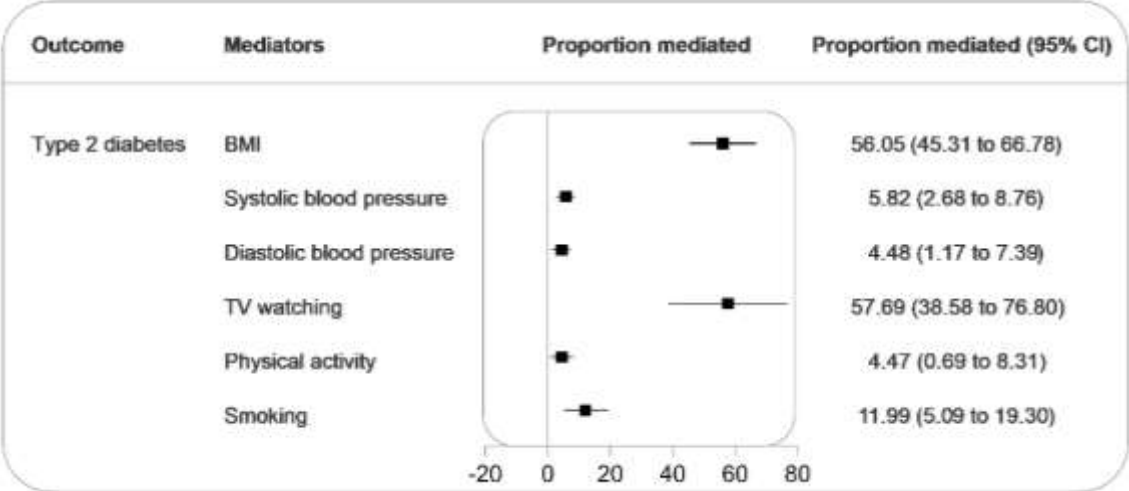

Estimates of individual proportion mediated from multivariable Mendelian randomisation using the difference in regression coefficient method.

ESM Figure 5. Estimates for the effect of education on type 2 diabetes explained by mediators individually (product of coefficients method)

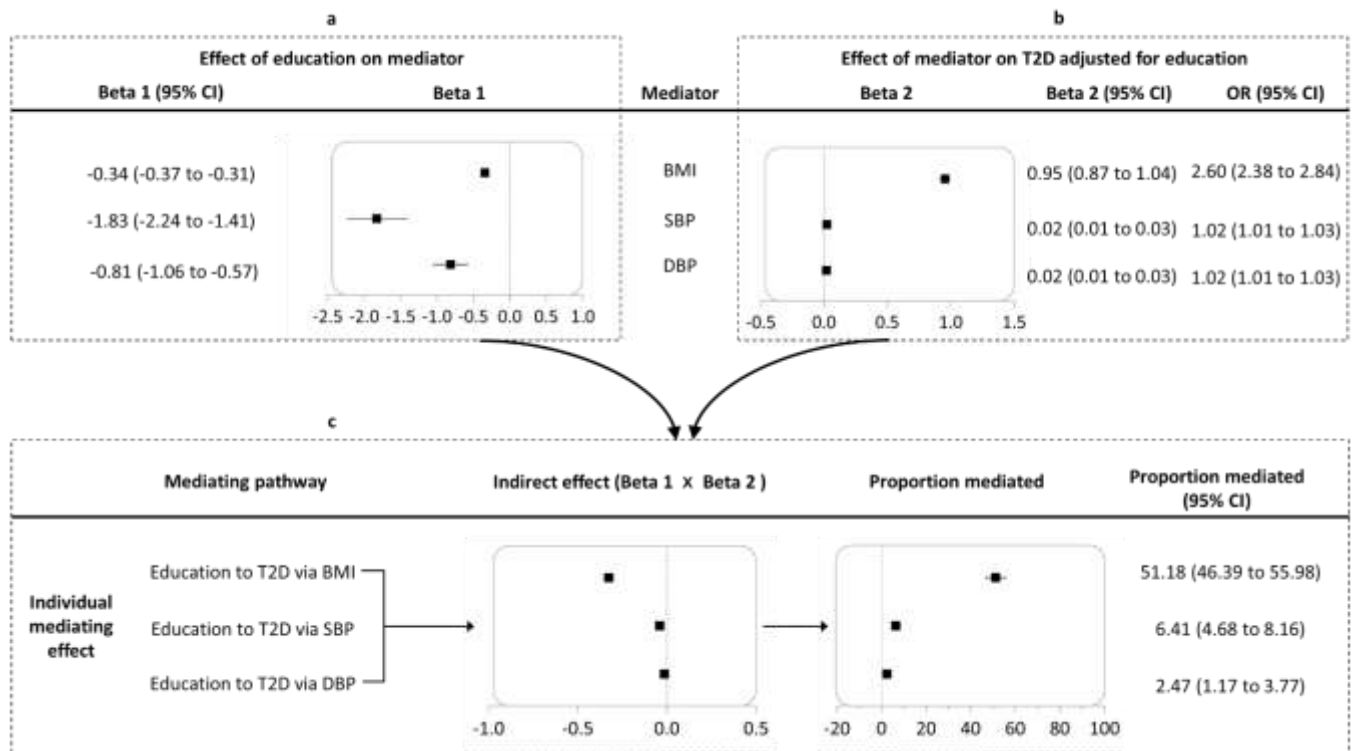

**ESM Figure 6.** MVMR estimates of combined proportion mediated by selected combinations of mediators

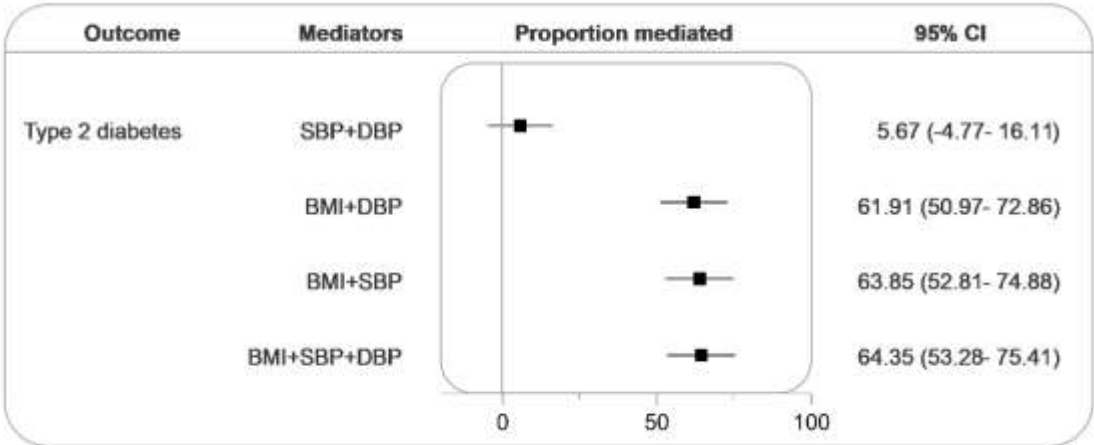

Estimates of combined proportion mediated from multivariable Mendelian randomisation using the difference in regression coefficient method.

## Supplementary references

- [1] Lawlor DA, Harbord RM, Sterne JA, Timpson N, Davey Smith G (2008) Mendelian randomization: using genes as instruments for making causal inferences in epidemiology. *Stat Med* 27:1133-1163
- [2] Bowden J, Davey Smith G, Burgess S (2015) Mendelian randomization with invalid instruments: effect estimation and bias detection through Egger regression. *Int J Epidemiol* 44:512-525
- [3] Hemani G, Bowden J, Davey Smith G (2018) Evaluating the potential role of pleiotropy in Mendelian randomization studies. *Hum Mol Genet* 27:R195-R208
- [4] Bowden J, Davey Smith G, Haycock PC, Burgess S (2016) Consistent estimation in Mendelian randomization with some invalid instruments using a weighted median estimator. *Genet Epidemiol* 40:304-314
- [5] Lumley T (2004) Analysis of complex survey samples. *Journal of statistical software* 9:1-19
- [6] R Core Team (2014) R: A language and environment for statistical computing. R Foundation for Statistical Computing, Vienna, Austria. URL <http://www.R-project.org/>.
- [7] Textor J, van der Zander B, Gilthorpe MS, Liškiewicz M, Ellison GT (2016) Robust causal inference using directed acyclic graphs: the R package 'dagitty'. *Int J Epidemiol* 45:1887-1894
